# Supplementary material for: A hybrid GA-PSO strategy for computing task offloading towards MES scenarios
Source: PeerJ journal article supplement (doi:10.7717/peerj-cs.1273), 2023-04-06
Supplement: data_and_code.zip [file 1GAPSOresult.xlsx]

## Sheet: GAPSO
10.743	159.833
23.8726	209.196
56.5322	242.531
110.418	280.706
142.036	340.846
