# Supplementary material for: A hybrid GA-PSO strategy for computing task offloading towards MES scenarios
Source: PeerJ journal article supplement (doi:10.7717/peerj-cs.1273), 2023-04-06
Supplement: data_and_code.zip [file 1GAresult.xlsx]

## Sheet: GAPSO
1952.04	147.006
2473.41	200.973
1270.2	183.228
3672.1	265.926
1930.49	294.841
