# Supplementary material for: A hybrid GA-PSO strategy for computing task offloading towards MES scenarios
Source: PeerJ journal article supplement (doi:10.7717/peerj-cs.1273), 2023-04-06
Supplement: data_and_code.zip [file 1NSAresult.xlsx]

## Sheet: nearest
9564.28	119
10680.9	130
11791	138
13566.9	143
16768.1	164
