# Supplementary material for: A hybrid GA-PSO strategy for computing task offloading towards MES scenarios
Source: PeerJ journal article supplement (doi:10.7717/peerj-cs.1273), 2023-04-06
Supplement: data_and_code.zip [file 2GAPSOresult.xlsx]

## Sheet: GAPSO
30.1877	199.6
95.8788	295
68.7541	364
107.377	384
196.08	455.869
