# Supplementary material for: A hybrid GA-PSO strategy for computing task offloading towards MES scenarios
Source: PeerJ journal article supplement (doi:10.7717/peerj-cs.1273), 2023-04-06
Supplement: data_and_code.zip [file 2GAresult.xlsx]

## Sheet: GAPSO
3057.02	121.541
2204.48	194
2227.45	231
3458.46	317
2554.01	277
