# Supplementary material for: A hybrid GA-PSO strategy for computing task offloading towards MES scenarios
Source: PeerJ journal article supplement (doi:10.7717/peerj-cs.1273), 2023-04-06
Supplement: data_and_code.zip [file 2NSAresult.xlsx]

## Sheet: nearest
8464.57	108
8370.61	112
9872.54	130
9540.08	131
11589.3	147
