# Supplementary material for: A hybrid GA-PSO strategy for computing task offloading towards MES scenarios
Source: PeerJ journal article supplement (doi:10.7717/peerj-cs.1273), 2023-04-06
Supplement: data_and_code.zip [file 3GAPSOresult.xlsx]

## Sheet: GAPSO
81.0245	240.337
150.38	283.831
121.605	344
134.165	464.642
223.194	535
