# Supplementary material for: A hybrid GA-PSO strategy for computing task offloading towards MES scenarios
Source: PeerJ journal article supplement (doi:10.7717/peerj-cs.1273), 2023-04-06
Supplement: data_and_code.zip [file 3GAresult.xlsx]

## Sheet: GA
793.284	168.774
1393.74	253.894
1065.53	218.583
1583.93	236.602
1545.65	242.676
