# Supplementary material for: A hybrid GA-PSO strategy for computing task offloading towards MES scenarios
Source: PeerJ journal article supplement (doi:10.7717/peerj-cs.1273), 2023-04-06
Supplement: data_and_code.zip [file 3NSAresult.xlsx]

## Sheet: nearest
8772.13	121
7999.04	126
7930.87	147
8059.9	148
8459.07	153
