# Supplementary material for: A hybrid GA-PSO strategy for computing task offloading towards MES scenarios
Source: PeerJ journal article supplement (doi:10.7717/peerj-cs.1273), 2023-04-06
Supplement: data_and_code.zip [file 4GAPSOresult.xlsx]

## Sheet: nearest
60.0507	239.554
80.1054	311.957
121.605	344
134.165	464.642
223.194	535
