# Supplementary material for: A hybrid GA-PSO strategy for computing task offloading towards MES scenarios
Source: PeerJ journal article supplement (doi:10.7717/peerj-cs.1273), 2023-04-06
Supplement: data_and_code.zip [file 4GAresult.xlsx]

## Sheet: GA
3015.82	123.265
2124.61	174
1512.21	179
1516	363.946
1978.01	320
