# Supplementary material for: A hybrid GA-PSO strategy for computing task offloading towards MES scenarios
Source: PeerJ journal article supplement (doi:10.7717/peerj-cs.1273), 2023-04-06
Supplement: data_and_code.zip [file 4NSAresult.xlsx]

## Sheet: nearest
6461.72	108
6361.47	112
7192.79	130
7176.97	131
9522.66	131
