# Supplementary material for: A hybrid GA-PSO strategy for computing task offloading towards MES scenarios
Source: PeerJ journal article supplement (doi:10.7717/peerj-cs.1273), 2023-04-06
Supplement: data_and_code.zip [file bs_end.xlsx]

## Sheet: Sheet
mcc	mnc	lac	ci	lat	lon	acc	date	addr	province	city	district	township	x	y
460	0	1004	2363	30.67388916	104.05641937	100	20190218						31637054	7615848
460	0	810	3062	30.66841698	104.05769348	207	20180813						31637196	7616305
460	0	810	3063	30.66993332	104.05517578	289	20180813						31636916	7616178
460	0	810	4061	30.66463852	104.05811310	100	20180813						31637243	7616621
460	0	810	4102	30.66987991	104.07070160	100	20180813						31638645	7616183
460	0	810	4143	30.66775513	104.06505585	100	20180813						31638016	7616360
460	0	810	5032	30.66732597	104.06088257	100	20180813						31637551	7616396
460	0	810	6341	30.66935539	104.06730652	290	20180813						31638267	7616227
460	0	810	6342	30.66683769	104.06596375	207	20180813						31638117	7616437
460	0	810	12024	30.67228127	104.06165314	100	20180813						31637637	7615982
460	0	810	12025	30.66948318	104.05992126	100	20180813						31637444	7616216
460	0	810	12026	30.67406654	104.05773163	100	20180813						31637200	7615833
460	0	810	12074	30.66952133	104.06385803	289	20180813						31637883	7616213
460	0	810	12075	30.67009735	104.06689453	290	20180813						31638221	7616165
460	0	810	12076	30.67019653	104.06306458	289	20180813						31637794	7616156
460	0	810	17705	30.66473770	104.06227112	290	20180813						31637706	7616613
460	0	810	17706	30.66438293	104.05857849	294	20180813						31637295	7616642
460	0	810	29485	30.67061424	104.07019806	545	20180813						31638589	7616121
460	0	810	30844	30.66982460	104.06388855	289	20180813						31637886	7616187
460	0	810	30845	30.67133713	104.06348419	289	20180813						31637841	7616061
