# Supplementary material for: A hybrid GA-PSO strategy for computing task offloading towards MES scenarios
Source: PeerJ journal article supplement (doi:10.7717/peerj-cs.1273), 2023-04-06
Supplement: data_and_code.zip [file edge_location1.xlsx]

## Sheet: edge_locat
31638267	7616227
31637243	7616621
31637054	7615848
31637794	7616156
31638645	7616183
