# Supplementary material for: A hybrid GA-PSO strategy for computing task offloading towards MES scenarios
Source: PeerJ journal article supplement (doi:10.7717/peerj-cs.1273), 2023-04-06
Supplement: data_and_code.zip [file edge_location3.xlsx]

## Sheet: edge_locat
31637200	7615833
31638645	7616183
31637295	7616642
31637883	7616213
