# Supplementary material for: A hybrid GA-PSO strategy for computing task offloading towards MES scenarios
Source: PeerJ journal article supplement (doi:10.7717/peerj-cs.1273), 2023-04-06
Supplement: data_and_code.zip [file edge_location4.xlsx]

## Sheet: edge_locat
31637444	7616216
31638589	7616121
31637295	7616642
31638016	7616360
31637054	7615848
31637886	7616187
