# Supplementary material for: A hybrid GA-PSO strategy for computing task offloading towards MES scenarios
Source: PeerJ journal article supplement (doi:10.7717/peerj-cs.1273), 2023-04-06
Supplement: data_and_code.zip [file graph_matrix1.xlsx]

## Sheet: graph_matrix
0	0	540	0	0	0	0	0	0	0	0	540	0	0	0	0	0	0	0	0
0	0	540	540	0	0	0	0	0	0	540	0	0	0	0	0	0	0	0	0
540	540	0	0	0	0	0	0	0	0	0	540	0	0	0	0	0	0	0	0
0	540	0	0	0	0	540	0	0	0	0	0	0	0	0	0	540	0	0	0
0	0	0	0	0	0	0	540	0	0	0	0	0	540	0	0	0	540	0	0
0	0	0	0	0	0	0	0	540	0	0	0	0	540	0	540	0	0	0	0
0	0	0	540	0	0	0	0	0	0	540	0	0	0	0	540	0	0	0	0
0	0	0	0	540	0	0	0	540	0	0	0	0	540	0	0	0	0	0	0
0	0	0	0	0	540	0	540	0	0	0	0	540	0	0	0	0	0	0	0
0	0	0	0	0	0	0	0	0	0	540	540	0	0	0	0	0	0	0	540
0	540	0	0	0	0	540	0	0	540	0	0	0	0	0	0	0	0	0	0
540	0	540	0	0	0	0	0	0	540	0	0	0	0	0	0	0	0	0	0
0	0	0	0	0	0	0	0	540	0	0	0	0	0	540	0	0	0	540	0
0	0	0	0	540	540	0	540	0	0	0	0	0	0	0	0	0	0	0	0
0	0	0	0	0	0	0	0	0	0	0	0	540	0	0	0	0	0	540	540
0	0	0	0	0	540	540	0	0	0	0	0	0	0	0	0	540	0	0	0
0	0	0	540	0	0	0	0	0	0	0	0	0	0	0	540	0	0	0	0
0	0	0	0	540	0	0	0	0	0	0	0	0	0	0	0	0	0	0	0
0	0	0	0	0	0	0	0	0	0	0	0	540	0	540	0	0	0	0	540
0	0	0	0	0	0	0	0	0	540	0	0	0	0	540	0	0	0	540	0
