# Supplementary material for: A hybrid GA-PSO strategy for computing task offloading towards MES scenarios
Source: PeerJ journal article supplement (doi:10.7717/peerj-cs.1273), 2023-04-06
Supplement: data_and_code.zip [file task.xlsx]

## Sheet: Sheet
3000																				4000																				5000
12.2636	29.8037	37.3939	16.8452	29.3126	21.2742	12.1038	24.6031	34.6045	7.99574	23.3304	35.2156	27.1909	28.228	32.7131	9.31607	31.0115	32.5678	21.1511	30.1871	12.2636	29.8037	37.3939	16.8452	29.3126	21.2742	12.1038	24.6031	34.6045	7.99574	23.3304	35.2156	27.1909	28.228	32.7131	9.31607	31.0115	32.5678	21.1511	30.1871	12.2636	29.8037	37.3939	16.8452	29.3126	21.2742	12.1038	24.6031	34.6045	7.99574
22.8366	10.7691	20.5878	17.2365	18.1298	20.0439	8.37275	22.2421	30.317	10.6109	32.4177	16.6271	15.6853	23.6681	23.1847	38.7804	7.25773	32.7499	15.0912	29.849	22.8366	10.7691	20.5878	17.2365	18.1298	20.0439	8.37275	22.2421	30.317	10.6109	32.4177	16.6271	15.6853	23.6681	23.1847	38.7804	7.25773	32.7499	15.0912	29.849	22.8366	10.7691	20.5878	17.2365	18.1298	20.0439	8.37275	22.2421	30.317	10.6109
29.571	23.3576	23.0174	38.0937	14.1482	9.52502	24.8322	12.2425	27.5157	12.1685	32.1471	17.5378	7.71334	12.9545	17.3671		16.4854	34.2893	13.6296	16.9012	29.571	23.3576	23.0174	38.0937	14.1482	9.52502	24.8322	12.2425	27.5157	12.1685	32.1471	17.5378	7.71334	12.9545	17.3671	32.5287	16.4854	34.2893	13.6296	16.9012	29.571	23.3576	23.0174	38.0937	14.1482	9.52502	24.8322	12.2425	27.5157	12.1685
29.9481	11.1974	25.4747	11.614	34.4951	34.1646	27.385	32.3796	17.3443	8.43626	39.5143	28.2874	34.1106	24.5755	12.0481		16.6572	11.1365	22.6354	16.1223	29.9481	11.1974	25.4747	11.614	34.4951	34.1646	27.385	32.3796	17.3443	8.43626	39.5143	28.2874	34.1106	24.5755	12.0481	16.2212	16.6572	11.1365	22.6354	16.1223	29.9481	11.1974	25.4747	11.614	34.4951	34.1646	27.385	32.3796	17.3443	8.43626
28.3644	36.4135	31.1098	26.7971	25.4437	21.7773	16.556	20.1106	15.8131	11.6136	21.2311	27.7247	39.7535	37.6297	23.9774		22.7375	37.8697	20.3734	36.9121	28.3644	36.4135	31.1098	26.7971	25.4437	21.7773	16.556	20.1106	15.8131	11.6136	21.2311	27.7247	39.7535	37.6297	23.9774	8.49232	22.7375	37.8697	20.3734	36.9121	28.3644	36.4135	31.1098	26.7971	25.4437	21.7773	16.556	20.1106	15.8131	11.6136
30.5891	35.3208	11.1185	10.2754	25.9423	18.2392	14.6815	34.1434	28.0319	17.9222	34.1213	9.98992	30.1731	36.4186	9.12909		29.4281	33.4448	28.8708	9.05701	30.5891	35.3208	11.1185	10.2754	25.9423	18.2392	14.6815	34.1434	28.0319	17.9222	34.1213	9.98992	30.1731	36.4186	9.12909	9.01701	29.4281	33.4448	28.8708	9.05701	30.5891	35.3208	11.1185	10.2754	25.9423	18.2392	14.6815	34.1434	28.0319	17.9222
7.67882	12.7602	25.0785	28.2516	14.6891	10.614	37.1045	19.2676	25.6102	24.6003	25.1762	11.9253	14.4496	31.6581	10.5489			31.0703	26.4476	28.653	7.67882	12.7602	25.0785	28.2516	14.6891	10.614	37.1045	19.2676	25.6102	24.6003	25.1762	11.9253	14.4496	31.6581	10.5489		9.58455	31.0703	26.4476	28.653	7.67882	12.7602	25.0785	28.2516	14.6891	10.614	37.1045	19.2676	25.6102	24.6003
23.7974	7.31874	34.0044	13.4052	20.6413	29.1965	25.3497	21.3668	22.7301	8.61275	33.3148	28.9598	26.5695	13.7215	37.141			10.0574	34.954	39.7877	23.7974	7.31874	34.0044	13.4052	20.6413	29.1965	25.3497	21.3668	22.7301	8.61275	33.3148	28.9598	26.5695	13.7215	37.141		19.4256	10.0574	34.954	39.7877	23.7974	7.31874	34.0044	13.4052	20.6413	29.1965	25.3497	21.3668	22.7301	8.61275
39.1375	23.9601	16.5865	35.6458	9.00545	37.5741	37.8967	26.8622	14.3787	19.9973	17.8553	19.3284	24.5108	30.1571	19.3349			27.6619	34.3458	27.8552	39.1375	23.9601	16.5865	35.6458	9.00545	37.5741	37.8967	26.8622	14.3787	19.9973	17.8553	19.3284	24.5108	30.1571	19.3349		10.766	27.6619	34.3458	27.8552	39.1375	23.9601	16.5865	35.6458	9.00545	37.5741	37.8967	26.8622	14.3787	19.9973
19.1746	23.6975	11.48	13.4594	39.2706	23.8146	37.3835	26.2294	10.1708	12.0264	38.5814	24.6617	29	10.1452	38.9972			33.0841	10.6441	9.4649	19.1746	23.6975	11.48	13.4594	39.2706	23.8146	37.3835	26.2294	10.1708	12.0264	38.5814	24.6617	29	10.1452	38.9972		17.0735	33.0841	10.6441	9.4649	19.1746	23.6975	11.48	13.4594	39.2706	23.8146	37.3835	26.2294	10.1708	12.0264
36.9475	9.60727	13.6292	24.3052	27.5101	37.1736	8.2796	12.4601	27.4879	13.066	24.567	8.96802	39.4325	32.3894	13.4351			32.466	13.3158	11.1872	36.9475	9.60727	13.6292	24.3052	27.5101	37.1736	8.2796	12.4601	27.4879	13.066	24.567	8.96802	39.4325	32.3894	13.4351		7.80793	32.466	13.3158	11.1872	36.9475	9.60727	13.6292	24.3052	27.5101	37.1736	8.2796	12.4601	27.4879	13.066
18.4452	25.8842	17.8621	31.6503	16.934	33.1929	39.4815	38.2546	11.9491	25.8845	36.0484	31.8423	32.1126	8.44354	25.328			8.62442	10.4986	18.941	18.4452	25.8842	17.8621	31.6503	16.934	33.1929	39.4815	38.2546	11.9491	25.8845	36.0484	31.8423	32.1126	8.44354	25.328		7.43722	8.62442	10.4986	18.941	18.4452	25.8842	17.8621	31.6503	16.934	33.1929	39.4815	38.2546	11.9491	25.8845
16.6619	31.0356	15.2896	34.4427	12.0564	37.9215	35.9301	10.2625	32.7483	18.8318	31.6824	32.0848	18.7496	7.63022	30.3285			20.8041	14.0954	28.7221	16.6619	31.0356	15.2896	34.4427	12.0564	37.9215	35.9301	10.2625	32.7483	18.8318	31.6824	32.0848	18.7496	7.63022	30.3285		20.9127	20.8041	14.0954	28.7221	16.6619	31.0356	15.2896	34.4427	12.0564	37.9215	35.9301	10.2625	32.7483	18.8318
25.8765	34.5546	14.5405	37.4216	15.6389	32.298	27.6518	24.2216	21.8459	18.5213	31.549	33.7345	29.6836	35.1772	16.7782			8.09099	13.8606	25.3423	25.8765	34.5546	14.5405	37.4216	15.6389	32.298	27.6518	24.2216	21.8459	18.5213	31.549	33.7345	29.6836	35.1772	16.7782		24.971	8.09099	13.8606	25.3423	25.8765	34.5546	14.5405	37.4216	15.6389	32.298	27.6518	24.2216	21.8459	18.5213
39.3836	7.39341	37.7872	37.6088	15.0642	23.8036	9.75519	15.6055	30.7879	14.5076	23.7881	11.5857	29.6825	32.4169	21.2116			7.31368	13.8961	33.1104	39.3836	7.39341	37.7872	37.6088	15.0642	23.8036	9.75519	15.6055	30.7879	14.5076	23.7881	11.5857	29.6825	32.4169	21.2116		16.1222	7.31368	13.8961	33.1104	39.3836	7.39341	37.7872	37.6088	15.0642	23.8036	9.75519	15.6055	30.7879	14.5076
35.0314	28.966	8.04991	14.9414	30.9997	16.6699	20.1862	31.5358	12.2677	27.8411	37.9144	38.112	30.0966	13.5056	16.0762			34.4508	7.30026	15.2276	35.0314	28.966	8.04991	14.9414	30.9997	16.6699	20.1862	31.5358	12.2677	27.8411	37.9144	38.112	30.0966	13.5056	16.0762		9.98273	34.4508	7.30026	15.2276	35.0314	28.966	8.04991	14.9414	30.9997	16.6699	20.1862	31.5358	12.2677	27.8411
16.3631	22.9455	20.9411	23.5793	10.7012	24.4981	39.7713	32.1258	33.5361	27.1385	29.2949	13.9284	17.9596	15.722	18.7558			34.1689	17.3596	25.6854	16.3631	22.9455	20.9411	23.5793	10.7012	24.4981	39.7713	32.1258	33.5361	27.1385	29.2949	13.9284	17.9596	15.722	18.7558		26.9904	34.1689	17.3596	25.6854	16.3631	22.9455	20.9411	23.5793	10.7012	24.4981	39.7713	32.1258	33.5361	27.1385
26.7146	22.8699	20.6369	12.4005	28.3986	38.8549	12.9833	25.3927	8.23191	7.26621	16.1253	14.6108	8.95557	23.5938	18.2423			18.8994	26.3663	20.9306	26.7146	22.8699	20.6369	12.4005	28.3986	38.8549	12.9833	25.3927	8.23191	7.26621	16.1253	14.6108	8.95557	23.5938	18.2423		37.0106	18.8994	26.3663	20.9306	26.7146	22.8699	20.6369	12.4005	28.3986	38.8549	12.9833	25.3927	8.23191	7.26621
35.1576	34.346	12.0343	12.9172	18.8717	15.0744	14.5421	34.872	21.957	27.7337	36.7772	38.1589	35.5032	8.81032	12.7019			23.7842	11.8413	30.8981	35.1576	34.346	12.0343	12.9172	18.8717	15.0744	14.5421	34.872	21.957	27.7337	36.7772	38.1589	35.5032	8.81032	12.7019		7.97813	23.7842	11.8413	30.8981	35.1576	34.346	12.0343	12.9172	18.8717	15.0744	14.5421	34.872	21.957	27.7337
16.233	9.37907	29.1039	27.6944	17.3982	10.1998	39.4912	34.4562	16.7976	7.63718	34.109	16.5505	18.8179	28.8266	31.3136			14.1218	35.3036	13.3048	16.233	9.37907	29.1039	27.6944	17.3982	10.1998	39.4912	34.4562	16.7976	7.63718	34.109	16.5505	18.8179	28.8266	31.3136		9.15928	14.1218	35.3036	13.3048	16.233	9.37907	29.1039	27.6944	17.3982	10.1998	39.4912	34.4562	16.7976	7.63718
14.1834	23.2446	29.5665	31.9346	20.9027	17.6049	31.0858	14.396	17.0203	31.5371	10.7083	30.6608	30.1561	23.0767	18.9873			21.8433	23.8493	30.3823	14.1834	23.2446	29.5665	31.9346	20.9027	17.6049	31.0858	14.396	17.0203	31.5371	10.7083	30.6608	30.1561	23.0767	18.9873		37.3883	21.8433	23.8493	30.3823	14.1834	23.2446	29.5665	31.9346	20.9027	17.6049	31.0858	14.396	17.0203	31.5371
30.0103	16.6235	28.2704	8.44812	25.4233	7.13706	12.9699	8.89023	18.2816	21.0307	7.86298	8.8343	34.6812	36.3037	9.77622			24.284	35.942	34.4826	30.0103	16.6235	28.2704	8.44812	25.4233	7.13706	12.9699	8.89023	18.2816	21.0307	7.86298	8.8343	34.6812	36.3037	9.77622		26.5827	24.284	35.942	34.4826	30.0103	16.6235	28.2704	8.44812	25.4233	7.13706	12.9699	8.89023	18.2816	21.0307
23.6183	12.3648	15.0561	34.8289	35.7376	23.9887	24.2427	30.7087	14.4407	37.2927	7.87672	33.8797	24.9483	27.4163	20.1263			15.3304	14.6627	36.5341	23.6183	12.3648	15.0561	34.8289	35.7376	23.9887	24.2427	30.7087	14.4407	37.2927	7.87672	33.8797	24.9483	27.4163	20.1263		28.4989	15.3304	14.6627	36.5341	23.6183	12.3648	15.0561	34.8289	35.7376	23.9887	24.2427	30.7087	14.4407	37.2927
38.3309	34.4889	19.5298	33.1524	25.16	22.3948	18.9012	17.9884	28.196	16.9878	7.29106	37.7018	39.002	12.2203	9.52833			24.5737	12.8369	35.279	38.3309	34.4889	19.5298	33.1524	25.16	22.3948	18.9012	17.9884	28.196	16.9878	7.29106	37.7018	39.002	12.2203	9.52833		13.7954	24.5737	12.8369	35.279	38.3309	34.4889	19.5298	33.1524	25.16	22.3948	18.9012	17.9884	28.196	16.9878
20.7333	15.0561	11.9241	25.876	19.4789	7.77716	37.5463	22.8876	8.6612	29.2844	7.51489	34.5853	16.2456	7.27625	28.3271			15.4067	29.9476	13.8672	20.7333	15.0561	11.9241	25.876	19.4789	7.77716	37.5463	22.8876	8.6612	29.2844	7.51489	34.5853	16.2456	7.27625	28.3271		36.3753	15.4067	29.9476	13.8672	20.7333	15.0561	11.9241	25.876	19.4789	7.77716	37.5463	22.8876	8.6612	29.2844
35.438	20.5039	23.4856	26.7257	30.9637	32.514	7.9033	27.1069	21.578	7.36687	36.3322	27.6773	8.62669	18.228	21.423			38.0452	18.9196	12.3065	35.438	20.5039	23.4856	26.7257	30.9637	32.514	7.9033	27.1069	21.578	7.36687	36.3322	27.6773	8.62669	18.228	21.423		34.3534	38.0452	18.9196	12.3065	35.438	20.5039	23.4856	26.7257	30.9637	32.514	7.9033	27.1069	21.578	7.36687
34.7332	24.1318	32.037	36.3676	20.7357	29.3679	26.1879	24.7362	39.5176	24.6821		13.4949	18.6981	25.7825	22.2557			24.6673	20.6429	15.2163	34.7332	24.1318	32.037	36.3676	20.7357	29.3679	26.1879	24.7362	39.5176	24.6821	31.4295	13.4949	18.6981	25.7825	22.2557		7.82584	24.6673	20.6429	15.2163	34.7332	24.1318	32.037	36.3676	20.7357	29.3679	26.1879	24.7362	39.5176	24.6821
30.0788	24.8855	38.0179	25.4496	19.2467	17.4967	19.5009	30.8779	17.7439	13.2447		37.4428	15.6627	18.4139	34.2687			24.2323	28.5722	12.5191	30.0788	24.8855	38.0179	25.4496	19.2467	17.4967	19.5009	30.8779	17.7439	13.2447	28.6692	37.4428	15.6627	18.4139	34.2687		36.1945	24.2323	28.5722	12.5191	30.0788	24.8855	38.0179	25.4496	19.2467	17.4967	19.5009	30.8779	17.7439	13.2447
18.7729	32.8664	21.9872	11.8906	17.7298	28.3217	31.207	20.4345	8.06885	36.1065		17.614	11.3552	26.0946	25.2877			27.0495	38.433	29.1829	18.7729	32.8664	21.9872	11.8906	17.7298	28.3217	31.207	20.4345	8.06885	36.1065	38.4358	17.614	11.3552	26.0946	25.2877		22.4776	27.0495	38.433	29.1829	18.7729	32.8664	21.9872	11.8906	17.7298	28.3217	31.207	20.4345	8.06885	36.1065
12.9068	9.03838	39.4608	10.6099	25.3223	15.9117	25.9451	8.2962	38.6706	11.7303		8.01901	32.6027	15.3804	12.713			17.1066	31.9819	25.5564	12.9068	9.03838	39.4608	10.6099	25.3223	15.9117	25.9451	8.2962	38.6706	11.7303	24.4279	8.01901	32.6027	15.3804	12.713		22.9012	17.1066	31.9819	25.5564	12.9068	9.03838	39.4608	10.6099	25.3223	15.9117	25.9451	8.2962	38.6706	11.7303
39.1453	15.0332	31.7656	24.2194	38.055	14.2768	28.0378	13.8834	35.7573	13.2695		30.5295	26.4094	8.18987	35.1111			29.9845	32.4068	32.4117	39.1453	15.0332	31.7656	24.2194	38.055	14.2768	28.0378	13.8834	35.7573	13.2695	12.4371	30.5295	26.4094	8.18987	35.1111			29.9845	32.4068	32.4117	39.1453	15.0332	31.7656	24.2194	38.055	14.2768	28.0378	13.8834	35.7573	13.2695
13.1219	10.6517	30.9144	25.0818	9.42105	21.7497	15.9799	10.9978	22.9712	36.0327		14.6919	7.94321	14.1799	24.8486			34.0361	7.59812	35.2467	13.1219	10.6517	30.9144	25.0818	9.42105	21.7497	15.9799	10.9978	22.9712	36.0327	17.0708	14.6919	7.94321	14.1799	24.8486			34.0361	7.59812	35.2467	13.1219	10.6517	30.9144	25.0818	9.42105	21.7497	15.9799	10.9978	22.9712	36.0327
19.8407	30.0168	25.7713	27.7485	7.80341	9.21165	18.73	18.8055	39.129	34.0253		29.2986	16.0295	39.3656	24.8471			20.2732	8.26398	18.5929	19.8407	30.0168	25.7713	27.7485	7.80341	9.21165	18.73	18.8055	39.129	34.0253	31.7074	29.2986	16.0295	39.3656	24.8471			20.2732	8.26398	18.5929	19.8407	30.0168	25.7713	27.7485	7.80341	9.21165	18.73	18.8055	39.129	34.0253
14.5165	10.1739	23.2005	23.7245	9.08778	7.56899	39.9443	33.4317		27.1013		39.6088	28.908	10.2253	23.5008			26.0047	33.3997	16.4977	14.5165	10.1739	23.2005	23.7245	9.08778	7.56899	39.9443	33.4317	29.3147	27.1013	39.0058	39.6088	28.908	10.2253	23.5008			26.0047	33.3997	16.4977	14.5165	10.1739	23.2005	23.7245	9.08778	7.56899	39.9443	33.4317	29.3147	27.1013
9.15854	8.13323	22.8999	17.1735	29.7999	31.5423	14.6804	33.379		16.2788		17.0812	17.0197	38.3914	39.5378			36.1833	37.9332	32.4742	9.15854	8.13323	22.8999	17.1735	29.7999	31.5423	14.6804	33.379	36.1321	16.2788	34.3801	17.0812	17.0197	38.3914	39.5378			36.1833	37.9332	32.4742	9.15854	8.13323	22.8999	17.1735	29.7999	31.5423	14.6804	33.379	36.1321	16.2788
10.3882	10.7565	21.862	16.5157	30.2771	21.6184	15.7538	24.9302		31.818		33.691	29.0524	38.3825	36.4669			38.9129	25.4437	15.7895	10.3882	10.7565	21.862	16.5157	30.2771	21.6184	15.7538	24.9302	24.3613	31.818	28.1062	33.691	29.0524	38.3825	36.4669			38.9129	25.4437	15.7895	10.3882	10.7565	21.862	16.5157	30.2771	21.6184	15.7538	24.9302	24.3613	31.818
25.0037	12.8892	34.1757	17.7556	13.3938	18.9892	12.1643	37.0817		19.3135		31.6134	30.675	39.7816	15.7094			19.166	30.2521	37.2316	25.0037	12.8892	34.1757	17.7556	13.3938	18.9892	12.1643	37.0817	7.53195	19.3135	16.2842	31.6134	30.675	39.7816	15.7094			19.166	30.2521	37.2316	25.0037	12.8892	34.1757	17.7556	13.3938	18.9892	12.1643	37.0817	7.53195	19.3135
8.94366	20.1615	16.4676	33.1102	31.1571	12.3577	31.0723	38.3732		19.8994		35.9043	9.417	15.6003	29.1848			21.5676	25.7595	20.9955	8.94366	20.1615	16.4676	33.1102	31.1571	12.3577	31.0723	38.3732	32.95	19.8994	12.3692	35.9043	9.417	15.6003	29.1848			21.5676	25.7595	20.9955	8.94366	20.1615	16.4676	33.1102	31.1571	12.3577	31.0723	38.3732	32.95	19.8994
23.1202	12.0053	35.2135	37.6163	10.9789	32.4982	17.327	10.3858		8.99814		15.3893	30.9055	12.1731	32.5148			32.1022	32.8189	18.5603	23.1202	12.0053	35.2135	37.6163	10.9789	32.4982	17.327	10.3858	14.5424	8.99814	37.979	15.3893	30.9055	12.1731	32.5148			32.1022	32.8189	18.5603	23.1202	12.0053	35.2135	37.6163	10.9789	32.4982	17.327	10.3858	14.5424	8.99814
9.1568	20.5864	11.5059	22.3704	29.4704	10.9296	33.6603	20.2779		34.9803		20.7431	13.5246	14.1511	20.5682			34.0518	13.2563	26.44	9.1568	20.5864	11.5059	22.3704	29.4704	10.9296	33.6603	20.2779	21.5239	34.9803	8.29258	20.7431	13.5246	14.1511	20.5682			34.0518	13.2563	26.44	9.1568	20.5864	11.5059	22.3704	29.4704	10.9296	33.6603	20.2779	21.5239	34.9803
24.7769	31.3763	37.8081	10.7031	30.4111	12.8787	25.6113	24.9791		24.5063		17.3155	10.2295	18.8067	11.127			15.0446	16.415	14.953	24.7769	31.3763	37.8081	10.7031	30.4111	12.8787	25.6113	24.9791	18.5012	24.5063	31.727	17.3155	10.2295	18.8067	11.127			15.0446	16.415	14.953	24.7769	31.3763	37.8081	10.7031	30.4111	12.8787	25.6113	24.9791	18.5012	24.5063
17.9311	33.7677	21.1469	24.5673	7.53042	12.9862	15.5446	14.187		35.4149		18.548	11.5865	17.5684	31.1214			27.0908	25.6807	11.5137	17.9311	33.7677	21.1469	24.5673	7.53042	12.9862	15.5446	14.187	12.1549	35.4149	18.5475	18.548	11.5865	17.5684	31.1214			27.0908	25.6807	11.5137	17.9311	33.7677	21.1469	24.5673	7.53042	12.9862	15.5446	14.187	12.1549	35.4149
35.9667	9.25958	24.9627	20.2438	11.3048	16.8502	28.7353	27.4697		38.0577		8.92786	30.6848	26.8335	31.1971				25.1463	13.4173	35.9667	9.25958	24.9627	20.2438	11.3048	16.8502	28.7353	27.4697	28.0149	38.0577	10.9762	8.92786	30.6848	26.8335	31.1971			24.3618	25.1463	13.4173	35.9667	9.25958	24.9627	20.2438	11.3048	16.8502	28.7353	27.4697	28.0149	38.0577
31.7633	21.8729	25.4559	13.4375	26.9513	29.97	24.0457	15.4451		39.0851		16.6158	15.9263	28.3632	32.8791				8.29069	18.8991	31.7633	21.8729	25.4559	13.4375	26.9513	29.97	24.0457	15.4451	39.2868	39.0851	14.7568	16.6158	15.9263	28.3632	32.8791			31.9177	8.29069	18.8991	31.7633	21.8729	25.4559	13.4375	26.9513	29.97	24.0457	15.4451	39.2868	39.0851
22.2278	15.2914	17.0044	36.7381	26.7202	33.2894	33.9728	26.1735		20.7322		10.2568	13.8004	32.7494	22.9835				7.97697	28.6598	22.2278	15.2914	17.0044	36.7381	26.7202	33.2894	33.9728	26.1735	29.4883	20.7322	22.9007	10.2568	13.8004	32.7494	22.9835			8.86529	7.97697	28.6598	22.2278	15.2914	17.0044	36.7381	26.7202	33.2894	33.9728	26.1735	29.4883	20.7322
37.5796	11.5349	38.1839	10.2865	12.5467	9.4656	31.7367	23.0764		22.829		19.4972	24.9722	34.4662	8.8267				19.2635	21.6123	37.5796	11.5349	38.1839	10.2865	12.5467	9.4656	31.7367	23.0764	9.5779	22.829	15.438	19.4972	24.9722	34.4662	8.8267			12.7704	19.2635	21.6123	37.5796	11.5349	38.1839	10.2865	12.5467	9.4656	31.7367	23.0764	9.5779	22.829
13.3622	35.7915	7.11572	7.61225	17.9951	19.5929	37.2275	10.919		20.1869		36.9914	28.0254	31.3238	30.5049				10.311	16.7472	13.3622	35.7915	7.11572	7.61225	17.9951	19.5929	37.2275	10.919	30.6295	20.1869	31.1427	36.9914	28.0254	31.3238	30.5049			14.0059	10.311	16.7472	13.3622	35.7915	7.11572	7.61225	17.9951	19.5929	37.2275	10.919	30.6295	20.1869
14.3734	36.1892	26.9211	17.92	33.864	14.8987	16.5136	23.6391		20.3847		28.903	33.0342	22.3868	38.2053				15.9748	22.5335	14.3734	36.1892	26.9211	17.92	33.864	14.8987	16.5136	23.6391	29.4219	20.3847	12.27	28.903	33.0342	22.3868	38.2053			36.764	15.9748	22.5335	14.3734	36.1892	26.9211	17.92	33.864	14.8987	16.5136	23.6391	29.4219	20.3847
18.8881	7.86125	14.0974	32.0502	30.1925	17.8732	29.8335	14.2051		22.6935		26.9558	38.241	32.0053	25.8548				23.3498	18.153	18.8881	7.86125	14.0974	32.0502	30.1925	17.8732	29.8335	14.2051	24.7137	22.6935	17.6128	26.9558	38.241	32.0053	25.8548			19.0475	23.3498	18.153	18.8881	7.86125	14.0974	32.0502	30.1925	17.8732	29.8335	14.2051	24.7137	22.6935
29.321	28.8161	16.5616	17.9741	9.24497	37.9588	7.48684	15.4356		34.8749		10.5624	27.2193	37.8505	11.2634				17.2329	25.6813	29.321	28.8161	16.5616	17.9741	9.24497	37.9588	7.48684	15.4356	8.59568	34.8749	28.717	10.5624	27.2193	37.8505	11.2634			30.6327	17.2329	25.6813	29.321	28.8161	16.5616	17.9741	9.24497	37.9588	7.48684	15.4356	8.59568	34.8749
36.4692	28.8006	24.927	18.0639	22.0835	29.2366	21.0478	28.1491		17.8093		12.4556	16.4297	20.1093	7.40335				13.998	12.5482	36.4692	28.8006	24.927	18.0639	22.0835	29.2366	21.0478	28.1491	37.0593	17.8093	10.415	12.4556	16.4297	20.1093	7.40335			28.1855	13.998	12.5482	36.4692	28.8006	24.927	18.0639	22.0835	29.2366	21.0478	28.1491	37.0593	17.8093
13.7503	37.834	7.77573	36.4537	25.2676	31.8706	32.8955	10.0931		9.37822		38.8192	17.4022	16.1771	27.5353				14.7909	24.4694	13.7503	37.834	7.77573	36.4537	25.2676	31.8706	32.8955	10.0931	35.6683	9.37822	36.7367	38.8192	17.4022	16.1771	27.5353			37.9898	14.7909	24.4694	13.7503	37.834	7.77573	36.4537	25.2676	31.8706	32.8955	10.0931	35.6683	9.37822
27.8927	17.7645	15.4434	18.5214	17.0835	30.3181	17.5963	37.7728		7.44968		11.0745	21.9555	24.7255	34.2809				39.8161	14.2402	27.8927	17.7645	15.4434	18.5214	17.0835	30.3181	17.5963	37.7728	36.5738	7.44968	18.8737	11.0745	21.9555	24.7255	34.2809			27.9543	39.8161	14.2402	27.8927	17.7645	15.4434	18.5214	17.0835	30.3181	17.5963	37.7728	36.5738	7.44968
18.8436	11.9988	34.097	8.18938	30.9778	39.9603	38.9107	23.6931		26.7318		36.6011	26.5202	11.2963	21.0918				29.1906	13.0661	18.8436	11.9988	34.097	8.18938	30.9778	39.9603	38.9107	23.6931	20.069	26.7318	29.3474	36.6011	26.5202	11.2963	21.0918			18.9447	29.1906	13.0661	18.8436	11.9988	34.097	8.18938	30.9778	39.9603	38.9107	23.6931	20.069	26.7318
20.524	32.8547	25.9316	16.6062	16.1752	34.7754	36.3803	31.8618		34.0786		12.5358	23.7762	19.687	30.0705				22.397	24.2607	20.524	32.8547	25.9316	16.6062	16.1752	34.7754	36.3803	31.8618	26.2468	34.0786	29.1309	12.5358	23.7762	19.687	30.0705			14.8519	22.397	24.2607	20.524	32.8547	25.9316	16.6062	16.1752	34.7754	36.3803	31.8618	26.2468	34.0786
37.0534	38.4861	9.8029	10.5571	15.6168	23.9839	14.4942	15.9074		20.7743		25.6748	10.1844	21.9856	28.5444				39.9824	33.0959	37.0534	38.4861	9.8029	10.5571	15.6168	23.9839	14.4942	15.9074	12.8308	20.7743	33.4834	25.6748	10.1844	21.9856	28.5444			10.084	39.9824	33.0959	37.0534	38.4861	9.8029	10.5571	15.6168	23.9839	14.4942	15.9074	12.8308	20.7743
10.3463	8.90291	33.7345	35.2906	26.5444	32.1583	15.3599	21.5324		15.5669		27.9662	36.8931	14.3642	15.1148				23.3536	22.6368	10.3463	8.90291	33.7345	35.2906	26.5444	32.1583	15.3599	21.5324	13.7588	15.5669	36.5555	27.9662	36.8931	14.3642	15.1148			39.8907	23.3536	22.6368	10.3463	8.90291	33.7345	35.2906	26.5444	32.1583	15.3599	21.5324	13.7588	15.5669
9.69142	25.79	38.2136	10.9399	15.7843	27.8749	38.8208	32.7479		22.3805		11.9315	12.1032	32.4439	25.0743				30.151	27.501	9.69142	25.79	38.2136	10.9399	15.7843	27.8749	38.8208	32.7479	20.1202	22.3805	9.78884	11.9315	12.1032	32.4439	25.0743			8.52288	30.151	27.501	9.69142	25.79	38.2136	10.9399	15.7843	27.8749	38.8208	32.7479	20.1202	22.3805
34.0282	15.4911	30.7589	17.2452	30.5064	10.923	36.7345	30.2743		35.6437		14.9238	12.4209	26.5516	31.0883				9.87948	36.3973	34.0282	15.4911	30.7589	17.2452	30.5064	10.923	36.7345	30.2743	38.6114	35.6437	29.1463	14.9238	12.4209	26.5516	31.0883			26.0286	9.87948	36.3973	34.0282	15.4911	30.7589	17.2452	30.5064	10.923	36.7345	30.2743	38.6114	35.6437
25.2256	20.3678	35.971	26.1025	24.0239	29.8663	12.7431	37.7829		29.9524		29.0645	27.5757	18.2809	27.7383				29.9436	15.1213	25.2256	20.3678	35.971	26.1025	24.0239	29.8663	12.7431	37.7829	14.4562	29.9524	30.5174	29.0645	27.5757	18.2809	27.7383			28.6105	29.9436	15.1213	25.2256	20.3678	35.971	26.1025	24.0239	29.8663	12.7431	37.7829	14.4562	29.9524
35.7655	28.5383	25.92	14.355	37.3551	10.0462	18.2115	36.1267		14.5183		12.9074	29.5558	7.32019	9.86969				21.5835	15.9457	35.7655	28.5383	25.92	14.355	37.3551	10.0462	18.2115	36.1267	35.3301	14.5183	16.3596	12.9074	29.5558	7.32019	9.86969			32.8843	21.5835	15.9457	35.7655	28.5383	25.92	14.355	37.3551	10.0462	18.2115	36.1267	35.3301	14.5183
17.665	39.889	28.0029	36.8519	28.8805	29.9393	19.3621	25.9191		24.1464		27.0098	32.1386	31.5903	39.3245					21.61	17.665	39.889	28.0029	36.8519	28.8805	29.9393	19.3621	25.9191	10.363	24.1464	35.051	27.0098	32.1386	31.5903	39.3245			8.75731	39.3689	21.61	17.665	39.889	28.0029	36.8519	28.8805	29.9393	19.3621	25.9191	10.363	24.1464
20.023	22.3992	21.6909	10.0723	13.3176	39.3318	21.8108	18.8173		19.4458		9.28326	29.2024	32.8009	9.64827					35.896	20.023	22.3992	21.6909	10.0723	13.3176	39.3318	21.8108	18.8173	10.2989	19.4458	35.6228	9.28326	29.2024	32.8009	9.64827			26.5865	22.0271	35.896	20.023	22.3992	21.6909	10.0723	13.3176	39.3318	21.8108	18.8173	10.2989	19.4458
25.4118	18.7786	20.3699	38.1305	30.4672	11.7524	11	31.0787		7.54787		31.4292	10.6696	11.1571	36.1009					9.31101	25.4118	18.7786	20.3699	38.1305	30.4672	11.7524	11	31.0787	11.6951	7.54787	15.3607	31.4292	10.6696	11.1571	36.1009			10.3229	13.2913	9.31101	25.4118	18.7786	20.3699	38.1305	30.4672	11.7524	11	31.0787	11.6951	7.54787
7.13313	24.5725	38.5269	30.5528	32.2429	20.9516	10.8374	36.0105		21.4262		33.2639	29.6033	23.3013	23.2597					19.7352	7.13313	24.5725	38.5269	30.5528	32.2429	20.9516	10.8374	36.0105	14.7268	21.4262	18.5339	33.2639	29.6033	23.3013	23.2597			34.3682	13.4618	19.7352	7.13313	24.5725	38.5269	30.5528	32.2429	20.9516	10.8374	36.0105	14.7268	21.4262
32.0587	13.6917	39.4205	23.4944	26.6309	20.5322	21.5942			39.1397		14.7838	15.5347	17.1866	28.9829					22.9583	32.0587	13.6917	39.4205	23.4944	26.6309	20.5322	21.5942	11.4014		39.1397	23.5237	14.7838	15.5347	17.1866	28.9829			36.2575	29.2386	22.9583	32.0587	13.6917	39.4205	23.4944	26.6309	20.5322	21.5942	11.4014	8.36603	39.1397
25.7084	21.3603	13.3997	32.3946	14.5893	11.3323	12.6933			37.5239		14.2911	38.3088	19.2946	29.4052					18.177	25.7084	21.3603	13.3997	32.3946	14.5893	11.3323	12.6933	39.6537		37.5239	8.28398	14.2911	38.3088	19.2946	29.4052			25.8985	18.4897	18.177	25.7084	21.3603	13.3997	32.3946	14.5893	11.3323	12.6933	39.6537	26.7686	37.5239
28.635	28.7788	25.9417	20.6692	16.7547	14.6518	19.0194			25.5625		16.1379	26.0338	9.64309	7.7806					39.1584	28.635	28.7788	25.9417	20.6692	16.7547	14.6518	19.0194	29.9176		25.5625	31.6499	16.1379	26.0338	9.64309	7.7806			23.6803	12.5086	39.1584	28.635	28.7788	25.9417	20.6692	16.7547	14.6518	19.0194	29.9176	7.56615	25.5625
35.537	9.56013	13.0512	33.2846	36.8494	7.82672	13.6023			21.7695		28.0478	18.5456	37.8738	16.4669					13.3269	35.537	9.56013	13.0512	33.2846	36.8494	7.82672	13.6023	20.5613		21.7695	7.87088	28.0478	18.5456	37.8738	16.4669			34.5829	39.4488	13.3269	35.537	9.56013	13.0512	33.2846	36.8494	7.82672	13.6023	20.5613	30.4041	21.7695
30.4314	34.4998	22.7976	31.8164	21.9714	22.0323	8.08541			15.0679		22.1088	15.3587	22.5766	18.3612					13.3388	30.4314	34.4998	22.7976	31.8164	21.9714	22.0323	8.08541	21.7372		15.0679	38.927	22.1088	15.3587	22.5766	18.3612			32.7375	27.8692	13.3388	30.4314	34.4998	22.7976	31.8164	21.9714	22.0323	8.08541	21.7372	39.2101	15.0679
14.9071	24.6905	12.77	25.8032	8.12879	19.6302	11.6049			7.64168			28.999	26.8019	39.8724					19.5851	14.9071	24.6905	12.77	25.8032	8.12879	19.6302	11.6049	22.5472		7.64168	10.3724	36.3065	28.999	26.8019	39.8724			21.6335	36.7849	19.5851	14.9071	24.6905	12.77	25.8032	8.12879	19.6302	11.6049	22.5472	35.4893	7.64168
15.2868	33.9101	15.7054	32.6685	37.0576	7.73279	21.1183			33.1677			8.39618	34.668	24.3696					28.48	15.2868	33.9101	15.7054	32.6685	37.0576	7.73279	21.1183	15.5134		33.1677	10.606	37.5879	8.39618	34.668	24.3696			8.09773	19.1583	28.48	15.2868	33.9101	15.7054	32.6685	37.0576	7.73279	21.1183	15.5134	7.08769	33.1677
15.9314	39.7165	24.7067	30.8155	11.6065	32.1952	38.3246			16.4277			33.8806	12.4953	30.4635					17.8364	15.9314	39.7165	24.7067	30.8155	11.6065	32.1952	38.3246	33.1741		16.4277	36.9015	7.30816	33.8806	12.4953	30.4635			25.3031		17.8364	15.9314	39.7165	24.7067	30.8155	11.6065	32.1952	38.3246	33.1741	16.9624	16.4277
17.6282	38.2061	19.9675	21.229	15.8722	35.4465	35.9175			17.3504			38.7157	20.2831	38.819					14.2731	17.6282	38.2061	19.9675	21.229	15.8722	35.4465	35.9175	32.0008		17.3504	36.2001	38.6633	38.7157	20.2831	38.819			34.6189		14.2731	17.6282	38.2061	19.9675	21.229	15.8722	35.4465	35.9175	32.0008	26.8495	17.3504
26.6697	27.3491	16.6317	15.9481	20.0102	35.3401	34.9939			23.3506			21.8063	16.1719	8.13839					35.9455	26.6697	27.3491	16.6317	15.9481	20.0102	35.3401	34.9939	36.6179		23.3506	11.5922	32.805	21.8063	16.1719	8.13839			17.4226		35.9455	26.6697	27.3491	16.6317	15.9481	20.0102	35.3401	34.9939	36.6179	10.3273	23.3506
23.4419	27.0003	31.4993	37.3186	21.2675	25.58	7.35202			11.8786			11.8859	11.1631	12.9985					11.348	23.4419	27.0003	31.4993	37.3186	21.2675	25.58	7.35202	24.2408		11.8786	18.5629	7.98331	11.8859	11.1631	12.9985			27.0439		11.348	23.4419	27.0003	31.4993	37.3186	21.2675	25.58	7.35202	24.2408	22.1923	11.8786
30.7177	38.8305	36.5812	12.5146	31.2689	16.4909	21.9727			7.5896			31.6815	18.1542	27.3023					32.6975	30.7177	38.8305	36.5812	12.5146	31.2689	16.4909	21.9727	38.8333		7.5896	20.7426	7.5384	31.6815	18.1542	27.3023			33.4244		32.6975	30.7177	38.8305	36.5812	12.5146	31.2689	16.4909	21.9727	38.8333	30.2573	7.5896
21.6393	33.1958	14.5768	15.1226	16.3481	32.8676	13.056			33.9146			8.60626	16.3025	21.8015					38.1439	21.6393	33.1958	14.5768	15.1226	16.3481	32.8676	13.056	22.2194		33.9146	21.5543	26.9668	8.60626	16.3025	21.8015			34.0626		38.1439	21.6393	33.1958	14.5768	15.1226	16.3481	32.8676	13.056	22.2194	11.94	33.9146
21.132	20.3435	36.9291	20.7816	25.3602	10.7458	33.6371			7.26384			21.5625	39.4005	27.1441					37.9091	21.132	20.3435	36.9291	20.7816	25.3602	10.7458	33.6371	32.5603		7.26384	7.55324	14.2396	21.5625	39.4005	27.1441			17.5696		37.9091	21.132	20.3435	36.9291	20.7816	25.3602	10.7458	33.6371	32.5603	13.9623	7.26384
25.8958	36.1777	33.1499	28.7298	39.2081	33.6684	36.669			33.178			27.1447	31.0727	35.757					36.431	25.8958	36.1777	33.1499	28.7298	39.2081	33.6684	36.669	21.9583		33.178	33.7622	24.8051	27.1447	31.0727	35.757			32.1536		36.431	25.8958	36.1777	33.1499	28.7298	39.2081	33.6684	36.669	21.9583	13.7313	33.178
18.6971	37.1877	35.17	30.6585	18.8284	24.2369	23.9112			25.3139			16.7206	9.27131	21.777					7.92607	18.6971	37.1877	35.17	30.6585	18.8284	24.2369	23.9112	22.4956		25.3139	38.7128	15.2381	16.7206	9.27131	21.777			12.4605		7.92607	18.6971	37.1877	35.17	30.6585	18.8284	24.2369	23.9112	22.4956	9.71459	25.3139
39.7782	7.99652	38.9871	19.4136	38.4811	19.1149	13.1433			23.4882			35.6897	38.2396	7.38207					37.6634	39.7782	7.99652	38.9871	19.4136	38.4811	19.1149	13.1433	33.4003		23.4882	37.3225	19.5799	35.6897	38.2396	7.38207			29.5894		37.6634	39.7782	7.99652	38.9871	19.4136	38.4811	19.1149	13.1433	33.4003	12.3256	23.4882
27.5606	27.6786	11.7802	19.6134	24.5669	17.455	8.46962			29.8542			10.5916	10.0138						37.1933	27.5606	27.6786	11.7802	19.6134	24.5669	17.455	8.46962	27.975		29.8542	11.659	10.7151	10.5916	10.0138	39.4795			32.8194		37.1933	27.5606	27.6786	11.7802	19.6134	24.5669	17.455	8.46962	27.975	37.5428	29.8542
		36.0078	12.1695	32.8477	18.7523	16.0165			17.8868			10.8725	12.2769						8.63594	15.6797	16.4715	36.0078	12.1695	32.8477	18.7523	16.0165	18.375		17.8868	36.7429	30.7804	10.8725	12.2769				26.9449		8.63594	15.6797	16.4715	36.0078	12.1695	32.8477	18.7523	16.0165	18.375	34.0385	17.8868
		13.6118	34.7977	34.9329	32.7858	39.7464			27.5421			35.759	30.0625						35.2335	14.3402	9.70142	13.6118	34.7977	34.9329	32.7858	39.7464	39.3542		27.5421	36.5559	24.4059	35.759	30.0625				12.4236		35.2335	14.3402	9.70142	13.6118	34.7977	34.9329	32.7858	39.7464	39.3542	17.5469	27.5421
		32.2892	34.0892	23.7584	32.8788	29.4406			13.5031			30.2829	33.7965						28.5785	20.6275	28.6248	32.2892	34.0892	23.7584	32.8788	29.4406	19.4541		13.5031	36.7228	34.3643	30.2829	33.7965				36.6639		28.5785	20.6275	28.6248	32.2892	34.0892	23.7584	32.8788	29.4406	19.4541	26.4804	13.5031
		22.4668	7.2851	14.6499	38.2189	27.2956			16.956			24.916	13.291						18.2674	31.7197	32.1786	22.4668	7.2851	14.6499	38.2189	27.2956	7.25136		16.956	7.24984	33.1604	24.916	13.291				25.1795		18.2674	31.7197	32.1786	22.4668	7.2851	14.6499	38.2189	27.2956	7.25136	11.6965	16.956
		35.8727	16.3013	34.1823	32.6232	26.8429			39.8069			22.6888	23.3142						27.0169	13.3637	20.7288	35.8727	16.3013	34.1823	32.6232	26.8429	35.6955		39.8069	10.6853	36.0751	22.6888	23.3142				27.2129		27.0169	13.3637	20.7288	35.8727	16.3013	34.1823	32.6232	26.8429	35.6955	24.6103	39.8069
		28.2791	36.4433	17.3221	37.5261	12.0174			25.7422			35.9735	11.9505						30.31	27.2495	39.6247	28.2791	36.4433	17.3221	37.5261	12.0174	20.6339		25.7422	20.714	23.7379	35.9735	11.9505				20.8009		30.31	27.2495	39.6247	28.2791	36.4433	17.3221	37.5261	12.0174	20.6339	24.6547	25.7422
		22.3018	39.6878	18.3977	12.327	16.1451			36.2055			24.8227	26.5176						20.6291	11.5397	21.2286	22.3018	39.6878	18.3977	12.327	16.1451	23.5388		36.2055	36.4795	13.1191	24.8227	26.5176				21.7723		20.6291	11.5397	21.2286	22.3018	39.6878	18.3977	12.327	16.1451	23.5388	14.7144	36.2055
		16.7262	31.0673	12.5818	7.01222	20.5527			12.1585			28.3459	19.7638						21.3042	11.5647	15.7091	16.7262	31.0673	12.5818	7.01222	20.5527	27.3584		12.1585	10.3564	37.2387	28.3459	19.7638				28.8061		21.3042	11.5647	15.7091	16.7262	31.0673	12.5818	7.01222	20.5527	27.3584	38.7443	12.1585
		8.87894	33.5245	26.2663	23.4108	11.2423			19.1463			28.9729	25.7321						24.5361	23.1102	24.5993	8.87894	33.5245	26.2663	23.4108	11.2423	8.98739		19.1463	10.0789	14.799	28.9729	25.7321				35.0377		24.5361	23.1102	24.5993	8.87894	33.5245	26.2663	23.4108	11.2423	8.98739	21.5646	19.1463
		24.8572	8.32125	9.43459	38.3993	37.0759			22.9039			36.0028	9.11648						25.2938	13.9711	30.7684	24.8572	8.32125	9.43459	38.3993	37.0759	7.85153		22.9039	10.3222	7.56198	36.0028	9.11648				34.6674		25.2938	13.9711	30.7684	24.8572	8.32125	9.43459	38.3993	37.0759	7.85153	24.7019	22.9039
		15.9607	11.1038	23.4065	11.8692	9.13635			14.9932			12.7171	32.3768						20.1601	22.2421	24.9219	15.9607	11.1038	23.4065	11.8692	9.13635	31.2218		14.9932	24.1067	11.2699	12.7171	32.3768				17.9113		20.1601	22.2421	24.9219	15.9607	11.1038	23.4065	11.8692	9.13635	31.2218	12.0182	14.9932
		22.8557	14.6405	12.121	9.48971	16.8336			14.8309			13.7215	39.289						28.0279	8.24396	13.8588	22.8557	14.6405	12.121	9.48971	16.8336	37.4571		14.8309	23.2188	36.5938	13.7215	39.289				35.6624		28.0279	8.24396	13.8588	22.8557	14.6405	12.121	9.48971	16.8336	37.4571	26.6852	14.8309
		7.33161	11.8991	28.0778	26.1374	34.0135			28.545			20.1098	13.8928						10.9198	29.5961	29.4792	7.33161	11.8991	28.0778	26.1374	34.0135	16.3218		28.545	34.5095	11.4711	20.1098	13.8928				11.4372		10.9198	29.5961	29.4792	7.33161	11.8991	28.0778	26.1374	34.0135	16.3218	14.3994	28.545
		13.2751	20.5149	31.8328	16.4066	17.1321			37.3281			34.7478	31.3834						10.7159	26.4393	37.5064	13.2751	20.5149	31.8328	16.4066	17.1321	21.903		37.3281	29.5483	32.9346	34.7478	31.3834				28.0055		10.7159	26.4393	37.5064	13.2751	20.5149	31.8328	16.4066	17.1321	21.903	11.027	37.3281
		14.9982	23.6891	30.401	32.3565	17.6648			35.4868			31.5955	23.8876						39.952	31.8069	25.7875	14.9982	23.6891	30.401	32.3565	17.6648	9.78824		35.4868	36.4218	9.6237	31.5955	23.8876				14.5902		39.952	31.8069	25.7875	14.9982	23.6891	30.401	32.3565	17.6648	9.78824	8.79064	35.4868
		33.5648	33.3716	14.6465	32.7277	35.3489			28.4754			29.4302	8.7412						26.4781	33.1946	35.7897	33.5648	33.3716	14.6465	32.7277	35.3489	13.2114		28.4754	7.13278	23.6888	29.4302	8.7412				27.8644		26.4781	33.1946	35.7897	33.5648	33.3716	14.6465	32.7277	35.3489	13.2114	23.7626	28.4754
		7.425	31.573	14.993	8.29081	33.8387			36.7075			36.1421	8.16219						21.0029	7.33635	26.1944	7.425	31.573	14.993	8.29081	33.8387	10.6579		36.7075	35.8457	17.1743	36.1421	8.16219				23.3347		21.0029	7.33635	26.1944	7.425	31.573	14.993	8.29081	33.8387	10.6579	22.6382	36.7075
		39.548	28.5752	10.2897	8.70306	13.6639			37.8557			19.3838	23.2116						18.3271	10.4442	11.819	39.548	28.5752	10.2897	8.70306	13.6639	27.0206		37.8557	16.9835	35.8048	19.3838	23.2116				7.10392		18.3271	10.4442	11.819	39.548	28.5752	10.2897	8.70306	13.6639	27.0206	34.6015	37.8557
		29.3202	16.2905	26.4354	36.1146	38.7425			33.9259			15.4818	18.8256						9.84806	27.6373	32.3012	29.3202	16.2905	26.4354	36.1146	38.7425	25.919		33.9259	35.5141	28.3849	15.4818	18.8256				21.991		9.84806	27.6373	32.3012	29.3202	16.2905	26.4354	36.1146	38.7425	25.919	37.1508	33.9259
		26.6165	7.82036	30.6752	26.798	34.5784			35.2418			8.12242	17.1242						30.8511	38.0237	13.4742	26.6165	7.82036	30.6752	26.798	34.5784	26.2843		35.2418	13.4126	19.0119	8.12242	17.1242				20.2677		30.8511	38.0237	13.4742	26.6165	7.82036	30.6752	26.798	34.5784	26.2843	10.2537	35.2418
		19.3703	9.77287	32.933	26.1576	26.5812			21.9411			9.97354	23.5339						19.5726	37.1294	21.4577	19.3703	9.77287	32.933	26.1576	26.5812	38.4025		21.9411	15.3672	9.25061	9.97354	23.5339				22.9143		19.5726	37.1294	21.4577	19.3703	9.77287	32.933	26.1576	26.5812	38.4025	26.9472	21.9411
		33.8344	21.4842	12.1909	28.7507	13.1414			37.9502			18.89	39.7114						9.67356	32.8584	25.1168	33.8344	21.4842	12.1909	28.7507	13.1414	28.1346		37.9502	13.4388	17.2843	18.89	39.7114				26.8974		9.67356	32.8584	25.1168	33.8344	21.4842	12.1909	28.7507	13.1414	28.1346	24.5693	37.9502
		30.7303	12.1758	14.1733	32.1675	22.0941			33.185			23.4883	30.5511						16.9427	33.3113	29.8082	30.7303	12.1758	14.1733	32.1675	22.0941	13.5113		33.185	19.8258	25.252	23.4883	30.5511				10.5715		16.9427	33.3113	29.8082	30.7303	12.1758	14.1733	32.1675	22.0941	13.5113	33.2261	33.185
		31.4044	20.4271	37.7216	25.6836	18.7993			23.1566			9.29229	12.3275						19.993	21.6639	11.4513	31.4044	20.4271	37.7216	25.6836	18.7993	18.4965		23.1566	36.1524	24.9254	9.29229	12.3275				15.4116		19.993	21.6639	11.4513	31.4044	20.4271	37.7216	25.6836	18.7993	18.4965	38.8249	23.1566
		16.729	34.0813	33.721	17.446	22.3958			13.9825			11.5527	19.1206						11.9732	19.5119	35.885	16.729	34.0813	33.721	17.446	22.3958	37.6305		13.9825	10.5087	36.5093	11.5527	19.1206				33.5495		11.9732	19.5119	35.885	16.729	34.0813	33.721	17.446	22.3958	37.6305	31.3412	13.9825
		30.6357	8.10991	35.8864	16.6006	21.2367			15.5748			39.577	9.36262						30.4825	11.552	25.7869	30.6357	8.10991	35.8864	16.6006	21.2367	9.02418		15.5748	11.3034	37.1511	39.577	9.36262				25.418		30.4825	11.552	25.7869	30.6357	8.10991	35.8864	16.6006	21.2367	9.02418	29.0455	15.5748
		13.0073	19.7126	27.0565	17.4889	32.8416			14.6729			15.2745	19.1292						38.6566	31.834	11.9918	13.0073	19.7126	27.0565	17.4889	32.8416	26.6517		14.6729	22.8874	8.93298	15.2745	19.1292				34.9268		38.6566	31.834	11.9918	13.0073	19.7126	27.0565	17.4889	32.8416	26.6517	12.3436	14.6729
		10.8133	25.2825	10.0502	12.0698	31.5032			37.4757			16.0699	32.9768						37.8079	13.8239	19.0167	10.8133	25.2825	10.0502	12.0698	31.5032	36.3098		37.4757	12.7715	16.9969	16.0699	32.9768				10.5376		37.8079	13.8239	19.0167	10.8133	25.2825	10.0502	12.0698	31.5032	36.3098	7.80643	37.4757
			33.5809	12.7886	22.3888	11.1608			12.1099			27.6592	26.4557						36.7859	23.4844	38.7725	34.3645	33.5809	12.7886	22.3888	11.1608	35.1362		12.1099	17.669	25.6613	27.6592	26.4557				8.51426		36.7859	23.4844	38.7725	34.3645	33.5809	12.7886	22.3888	11.1608	35.1362	11.844	12.1099
			35.6307	38.1544	15.9134	8.67989			32.0127			28.215	25.1745						23.7651	30.2072	26.5769	23.369	35.6307	38.1544	15.9134	8.67989	21.4495		32.0127	17.6924	29.3289	28.215	25.1745				35.3557		23.7651	30.2072	26.5769	23.369	35.6307	38.1544	15.9134	8.67989	21.4495	22.0335	32.0127
			13.0091	19.8726	16.683	15.7406			17.7406			24.3789	16.6445						13.6668	23.9478	8.34459	34.6846	13.0091	19.8726	16.683	15.7406	29.7105		17.7406	9.38465	39.6237	24.3789	16.6445				32.3208		13.6668	23.9478	8.34459	34.6846	13.0091	19.8726	16.683	15.7406	29.7105	9.76485	17.7406
			10.6741	39.1604	8.02586	8.83953			15.8609			22.1101	10.3787						23.2523	25.8982	16.4857	33.2195	10.6741	39.1604	8.02586	8.83953	31.7544		15.8609		9.96712	22.1101	10.3787				24.8105		23.2523	25.8982	16.4857	33.2195	10.6741	39.1604	8.02586	8.83953	31.7544	30.4215	15.8609
			31.3891	39.9225	17.4828	31.7592			8.36565			36.7032	36.384						23.9539	20.7308	29.2493	14.3569	31.3891	39.9225	17.4828	31.7592	20.9378		8.36565		26.3841	36.7032	36.384				23.9557		23.9539	20.7308	29.2493	14.3569	31.3891	39.9225	17.4828	31.7592	20.9378	29.327	8.36565
			23.7127	17.1691	33.7658	33.9301			29.6553			28.5964	14.4341						7.19663	20.0907	14.6629	24.9439	23.7127	17.1691	33.7658	33.9301	10.3358		29.6553		36.1134	28.5964	14.4341				27.8412		7.19663	20.0907	14.6629	24.9439	23.7127	17.1691	33.7658	33.9301	10.3358	17.6214	29.6553
			37.3936	35.1646	7.91928				13.3242			29.0129	17.1346						34.0943	36.9185	13.8283	20.1625	37.3936	35.1646	7.91928	29.3276	30.4502		13.3242		19.4319	29.0129	17.1346				28.9161		34.0943	36.9185	13.8283	20.1625	37.3936	35.1646	7.91928	29.3276	30.4502	37.0484	13.3242
			26.851	9.17588	22.2454				38.741			23.7728	36.6695						39.8912	26.1223	20.3169	15.0368	26.851	9.17588	22.2454	38.3442	20.1772		38.741		24.5121	23.7728	36.6695				20.6395		39.8912	26.1223	20.3169	15.0368	26.851	9.17588	22.2454	38.3442	20.1772	13.987	38.741
			36.5597	27.0945	39.7438				37.6093			24.7043	37.1191						8.8393	10.7306	23.5841	18.1985	36.5597	27.0945	39.7438	35.5267	38.6911		37.6093		21.7641	24.7043	37.1191				17.5497		8.8393	10.7306	23.5841	18.1985	36.5597	27.0945	39.7438	35.5267	38.6911	9.62226	37.6093
			17.2258	37.5555	37.8716				11.5737			39.5314	33.1517						20.8301	7.59359	33.8805	14.3596	17.2258	37.5555	37.8716	31.2945	29.8733		11.5737		23.0181	39.5314	33.1517				35.5154		20.8301	7.59359	33.8805	14.3596	17.2258	37.5555	37.8716	31.2945	29.8733	29.4062	11.5737
			34.7329	30.66	18.9898				21.2695			20.5357	26.023						21.5513	37.3135	17.0362	13.2528	34.7329	30.66	18.9898	37.4568	30.3296		21.2695		14.42	20.5357	26.023				19.9552		21.5513	37.3135	17.0362	13.2528	34.7329	30.66	18.9898	37.4568	30.3296		21.2695
			15.0274	32.5091	20.5653				38.7551			19.8633	33.2323						23.1583	21.6979	15.1278	37.4287	15.0274	32.5091	20.5653	32.8013			38.7551		35.6235	19.8633	33.2323				28.5406		23.1583	21.6979	15.1278	37.4287	15.0274	32.5091	20.5653	32.8013	19.5169		38.7551
			14.4654	20.7534	24.4657				22.897			8.10857	29.9904						26.9568	16.6522	34.5419	32.2102	14.4654	20.7534	24.4657	25.1217			22.897		27.0901	8.10857	29.9904				37.3755		26.9568	16.6522	34.5419	32.2102	14.4654	20.7534	24.4657	25.1217	10.6042		22.897
				25.1483	17.5932				30.7435			22.262	31.2767						16.9629	34.3448	35.9166	12.1934	16.933	25.1483	17.5932	18.7719			30.7435		28.8676	22.262	31.2767				7.14286		16.9629	34.3448	35.9166	12.1934	16.933	25.1483	17.5932	18.7719	25.5724		30.7435
				17.2418	7.37992				7.68528			29.5291	32.5375						32.9636	20.3743	19.6892	16.7921	14.3119	17.2418	7.37992	10.0655			7.68528		36.5022	29.5291	32.5375				25.9185		32.9636	20.3743	19.6892	16.7921	14.3119	17.2418	7.37992	10.0655	30.0798		7.68528
				19.5312	33.2855				25.1146			35.1796	33.1247						32.52	28.9287	36.1959	22.0251	27.0651	19.5312	33.2855	11.1813			25.1146		20.9009	35.1796	33.1247				21.1552		32.52	28.9287	36.1959	22.0251	27.0651	19.5312	33.2855	11.1813	22.2722		25.1146
				36.2415	10.4512				23.5257			18.4221	34.2626						25.2129	19.7186	24.0297	38.6422	19.1772	36.2415	10.4512	38.2932			23.5257		36.8744	18.4221	34.2626				15.181		25.2129	19.7186	24.0297	38.6422	19.1772	36.2415	10.4512	38.2932	37.0936		23.5257
				15.9071	9.47567				28.1013			18.4962	30.9496						15.5309	28.0119	22.0335	37.4029	25.7329	15.9071	9.47567	23.0971			28.1013		32.3981	18.4962	30.9496				39.9419		15.5309	28.0119	22.0335	37.4029	25.7329	15.9071	9.47567	23.0971	24.6055		28.1013
				32.5462	29.2617				11.8036			23.0798	27.4045						25.9771	39.2966	19.1351	11.5327	29.3506	32.5462	29.2617	27.8152			11.8036		22.3842	23.0798	27.4045				34.2002		25.9771	39.2966	19.1351	11.5327	29.3506	32.5462	29.2617	27.8152	11.3989		11.8036
				36.5714	27.2009				9.84581			8.078	15.6861						31.1759	39.2038	29.1338	22.6464	9.25688	36.5714	27.2009	7.77273			9.84581		9.71899	8.078	15.6861				18.2646		31.1759	39.2038	29.1338	22.6464	9.25688	36.5714	27.2009	7.77273	22.2264		9.84581
				10.2825	13.9266				19.373			38.6938	15.9223						29.9135	34.9502	7.26771	12.0677	25.7293	10.2825	13.9266	27.829			19.373		32.4887	38.6938	15.9223				25.6003		29.9135	34.9502	7.26771	12.0677	25.7293	10.2825	13.9266	27.829	18.3298		19.373
				14.5092	37.4756				38.8758			25.8884	15.3477						13.6448	27.7163	19.4022	25.6934	7.67674	14.5092	37.4756	30.005			38.8758		18.6197	25.8884	15.3477				7.91782		13.6448	27.7163	19.4022	25.6934	7.67674	14.5092	37.4756	30.005	39.748		38.8758
				17.5123	36.3662				33.3488			28.3574	21.1433						35.7344	38.4811	19.378	37.1065	28.717	17.5123	36.3662	33.8358			33.3488		23.7196	28.3574	21.1433				28.3608		35.7344	38.4811	19.378	37.1065	28.717	17.5123	36.3662	33.8358	33.4861		33.3488
				32.8865	11.3576				38.0197			38.6431	37.5299						29.3435	29.4959	18.6951	12.6798	30.7401	32.8865	11.3576	13.5815			38.0197		9.69485	38.6431	37.5299				22.472		29.3435	29.4959	18.6951	12.6798	30.7401	32.8865	11.3576	13.5815	9.89214		38.0197
				21.8525	26.3009				11.125			33.5266	26.3716						8.46114	8.42784	28.4031	25.743	29.5145	21.8525	26.3009	12.4654			11.125		18.5721	33.5266	26.3716				23.3105		8.46114	8.42784	28.4031	25.743	29.5145	21.8525	26.3009	12.4654	29.9599		11.125
				27.7853	7.86129				38.6374			14.3066	36.654						31.9964	35.9794	7.00613	11.5152	22.7955	27.7853	7.86129	15.4279			38.6374		9.70305	14.3066	36.654				26.6324		31.9964	35.9794	7.00613	11.5152	22.7955	27.7853	7.86129	15.4279	25.6809		38.6374
				10.356	35.7152				25.7223			25.0769	23.916						39.9388	30.1413	20.7898	26.5373	36.9209	10.356	35.7152	12.7682			25.7223		12.7926	25.0769	23.916				27.2383		39.9388	30.1413	20.7898	26.5373	36.9209	10.356	35.7152	12.7682	36.5863		25.7223
				12.4412	27.5794				24.9427			36.0347	8.7299						10.6416	34.4616	14.4053	31.0596	32.0714	12.4412	27.5794	11.9309			24.9427		21.9883	36.0347	8.7299				12.3506		10.6416	34.4616	14.4053	31.0596	32.0714	12.4412	27.5794	11.9309	34.5681		24.9427
				21.8453	16.2585				36.7615			36.4997	34.8694						32.1204	32.6542	30.0573	29.0025	17.4826	21.8453	16.2585	31.9015			36.7615		7.3432	36.4997	34.8694				28.9709		32.1204	32.6542	30.0573	29.0025	17.4826	21.8453	16.2585	31.9015	37.9909		36.7615
				10.0359	12.963				10.88			7.31474	19.3928						22.9858	21.092	21.7209	27.0485	25.5118	10.0359	12.963	38.3774			10.88		33.3923	7.31474	19.3928				17.8227		22.9858	21.092	21.7209	27.0485	25.5118	10.0359	12.963	38.3774	22.5258		10.88
				33.8961	31.567				17.0468			7.20703	16.2286						25.0609	21.88	39.0614	14.5923	14.2248	33.8961	31.567	23.128			17.0468		38.5924	7.20703	16.2286				38.6343		25.0609	21.88	39.0614	14.5923	14.2248	33.8961	31.567	23.128	7.97853		17.0468
				7.76788	24.5166				8.00852			21.9232	31.8119						14.3714	27.1257	36.5284	9.88271	8.39466	7.76788	24.5166				8.00852		9.97219	21.9232	31.8119				38.0239		14.3714	27.1257	36.5284	9.88271	8.39466	7.76788	24.5166	32.6242	29.4512		8.00852
				36.8029	28.2548				22.6831			14.5046	36.6495						27.6916	9.4704	37.0142	35.7917	19.3828	36.8029	28.2548				22.6831		31.6459	14.5046	36.6495				19.4863		27.6916	9.4704	37.0142	35.7917	19.3828	36.8029	28.2548	9.15778	16.2091		22.6831
				13.9165	17.9652				39.9846			21.4152	37.6158						10.6738	27.0493	22.5351	32.8911	38.7353	13.9165	17.9652				39.9846		31.3932	21.4152	37.6158				21.4275		10.6738	27.0493	22.5351	32.8911	38.7353	13.9165	17.9652	35.6604	14.3921		39.9846
				38.2206	19.0066				14.6045			29.1863	9.75628						18.7972	11.1514	37.3839	39.5639	26.192	38.2206	19.0066				14.6045		8.78494	29.1863	9.75628				19.2208		18.7972	11.1514	37.3839	39.5639	26.192	38.2206	19.0066	27.2712	27.9027		14.6045
				26.8224	34.5048				29.4078			39.1337	12.9243						34.3742	35.3674	11.932	8.22566	22.8214	26.8224	34.5048				29.4078		15.6864	39.1337	12.9243				14.8479		34.3742	35.3674	11.932	8.22566	22.8214	26.8224	34.5048	37.5298	35.9103		29.4078
				37.2344	25.4985				14.102			11.5019	24.5142						22.1058	9.04692	29.5449	8.27743	16.1945	37.2344	25.4985				14.102		25.1915	11.5019	24.5142				31.3647		22.1058	9.04692	29.5449	8.27743	16.1945	37.2344	25.4985	11.9554	37.4986		14.102
				14.9903	33.1121				20.4772			16.07	27.4351						35.5723	11.1698	28.7769	7.41008	30.3607	14.9903	33.1121				20.4772		11.7924	16.07	27.4351				12.8484		35.5723	11.1698	28.7769	7.41008	30.3607	14.9903	33.1121	16.1366	25.8507		20.4772
				22.9294	15.1824				8.7719			11.944	10.7122						37.5429	7.01827	21.4199	10.3219	7.42135	22.9294	15.1824				8.7719		22.3305	11.944	10.7122				20.2404		37.5429	7.01827	21.4199	10.3219	7.42135	22.9294	15.1824	20.2759	29.8352		8.7719
				17.787	33.9395				37.0593			13.0333	16.2816						27.3873	9.52096	7.59021	21.9287	18.2575	17.787	33.9395				37.0593		16.8001	13.0333	16.2816				23.5623		27.3873	9.52096	7.59021	21.9287	18.2575	17.787	33.9395	17.9745	39.598		37.0593
				39.7241	37.5419				8.93963			33.6711	34.8306						36.151	33.1529	18.8351	14.4773		39.7241	37.5419				8.93963		19.8987	33.6711	34.8306				14.0985		36.151	33.1529	18.8351	14.4773	34.6938	39.7241	37.5419	24.9532	33.8309		8.93963
				33.7084	31.9819				23.5246			10.3103	39.7026						29.1168	29.4539	30.221	36.5162		33.7084	31.9819				23.5246		19.8048	10.3103	39.7026				21.9343		29.1168	29.4539	30.221	36.5162	39.9985	33.7084	31.9819	15.3298	13.4135		23.5246
				33.5811	21.7119				33.7713			22.5197	34.6861						13.3677	28.9812	33.9632			33.5811	21.7119				33.7713		26.5615	22.5197	34.6861						13.3677	28.9812	33.9632	13.5779	16.1566	33.5811	21.7119	11.698	21.9493		33.7713
				38.8675	39.4855				34.9052			26.6322	32.4648						31.7534	32.3739	31.0649			38.8675	39.4855				34.9052		11.4178	26.6322	32.4648						31.7534	32.3739	31.0649	10.4532	9.71683	38.8675	39.4855	32.722	8.02061		34.9052
				28.6516	35.9492				12.3083			37.127	20.1631						21.0949	10.9623				28.6516	35.9492				12.3083		37.9917	37.127	20.1631						21.0949	10.9623	30.4234	32.9048	28.7577	28.6516	35.9492	24.9322	39.1255		12.3083
				39.914	21.727				11.4439			37.7695	39.3941						12.1248	14.9387				39.914	21.727				11.4439		9.65229	37.7695	39.3941						12.1248	14.9387	14.526	16.2808	29.8123	39.914	21.727	35.7146	19.3552		11.4439
				20.1242	13.8953				36.9436			10.6542	11.065						18.6389	34.5472				20.1242	13.8953				36.9436		18.4514	10.6542	11.065						18.6389	34.5472	35.2588	29.2102	24.4386	20.1242	13.8953	36.9438	20.2102		36.9436
				35.8835	34.3323				32.7396			19.7503	12.3194						32.3587	24.654				35.8835	34.3323				32.7396		38.0796	19.7503	12.3194						32.3587	24.654	10.5352	21.569	36.7442	35.8835	34.3323	15.8159	35.0968		32.7396
				17.9774	34.7979				16.9975			31.5564	37.4046						37.1018	7.3982				17.9774	34.7979				16.9975		25.953	31.5564	37.4046						37.1018	7.3982	31.3881	11.2218	19.1035	17.9774	34.7979	29.9697	24.014		16.9975
				34.8906	8.00931				7.58795			21.0008	31.3276						36.6524	22.4706				34.8906	8.00931				7.58795		11.7489	21.0008	31.3276						36.6524	22.4706		38.5519	37.2247	34.8906	8.00931	8.85396	28.6574		7.58795
				9.62422	22.6191				28.7921			38.4882	14.839						35.5611	12.9842				9.62422	22.6191				28.7921		38.6158	38.4882	14.839						35.5611	12.9842		19.3082	11.2918	9.62422	22.6191	21.7559	39.7019		28.7921
				12.6366	26.7649				22.7601			24.9334	25.9511						25.7878	28.1137				12.6366	26.7649				22.7601		21.7708	24.9334	25.9511						25.7878	28.1137		30.4658	29.2199	12.6366	26.7649	27.5499	20.5448		22.7601
				13.4922	19.1981				33.5643			33.7193	29.954						22.1054	19.6584				13.4922	19.1981				33.5643		15.0904	33.7193	29.954						22.1054	19.6584		38.0325	31.508	13.4922	19.1981	27.3763	28.2119		33.5643
				28.5044	14.962				25.0542			23.5231	26.2306						24.5384	12.2577				28.5044	14.962				25.0542		38.4058	23.5231	26.2306						24.5384	12.2577		37.1479	31.7281	28.5044	14.962	8.62672	35.0864		25.0542
				16.5149	26.3046				36.4438			27.3346	8.91633						16.0835	20.1449				16.5149	26.3046				36.4438		31.483	27.3346	8.91633						16.0835	20.1449		28.2501	20.6883	16.5149	26.3046	39.6196	33.9334		36.4438
				34.6331	32.3469				33.9257			28.4699	31.7326						19.2529	14.4678				34.6331	32.3469				33.9257		32.5832	28.4699	31.7326						19.2529	14.4678		21.6784	23.6772	34.6331	32.3469	14.7041	31.6793		33.9257
				16.2758	32.6373				33.8254			13.9602	7.58743						20.6385	32.435				16.2758	32.6373				33.8254		29.1834	13.9602	7.58743						20.6385	32.435		39.7442	15.2672	16.2758	32.6373	37.0051	34.3953		33.8254
				20.828	38.0904				35.7772			35.0789	22.2451						33.7831	21.9061				20.828	38.0904				35.7772		21.1002	35.0789	22.2451						33.7831	21.9061		31.9878	29.5782	20.828	38.0904	31.2442	20.0062		35.7772
				32.0365	36.8735				11.4033			37.7123	31.8019						32.3977	7.12039				32.0365	36.8735				11.4033		7.76795	37.7123	31.8019						32.3977	7.12039		13.3383	18.8523	32.0365	36.8735	35.083	24.9314		11.4033
				21.377	19.4612				31.7877			39.3361	23.6598						9.56822	15.0808				21.377	19.4612				31.7877		26.2344	39.3361	23.6598						9.56822	15.0808		37.5422	7.46243	21.377	19.4612	18.7997	27.8328		31.7877
				22.52	27.2581				32.6029			19.4414	20.5664						17.7058	11.12				22.52	27.2581				32.6029		17.1174	19.4414	20.5664						17.7058	11.12		20.3476	26.9793	22.52	27.2581	34.0446	19.0065		32.6029
				32.0231	9.29511				15.2305			36.316	28.0586						18.8853	32.4031				32.0231	9.29511				15.2305		34.4165	36.316	28.0586						18.8853	32.4031		39.1468	14.6023	32.0231	9.29511	8.32008	21.2379		15.2305
				7.28477	34.0862				34.9446			13.48	21.7653						17.8442	26.5523				7.28477	34.0862				34.9446		14.3847	13.48	21.7653						17.8442	26.5523		21.7925	20.0244	7.28477	34.0862	33.9985	35.6981		34.9446
				22.7757	21.3313				33.1954			11.5382	38.2849						25.3702	16.8119				22.7757	21.3313				33.1954		37.7083	11.5382	38.2849						25.3702	16.8119		7.2815	23.9227	22.7757	21.3313	16.4215	31.6393		33.1954
				19.6937	31.5501				11.2377			11.3611	14.7532						25.7428	21.762				19.6937	31.5501				11.2377		17.3643	11.3611	14.7532						25.7428	21.762		9.20913	38.9463	19.6937	31.5501	20.6351	38.7311		11.2377
				26.6275	12.342				29.4179			39.7642	12.6186						14.8608	17.227				26.6275	12.342				29.4179		11.869	39.7642	12.6186						14.8608	17.227		9.24017	19.765	26.6275	12.342	39.6229	7.25437		29.4179
				32.8973	13.4235				39.4332			33.2027	20.8517						19.1297	36.8736				32.8973	13.4235				39.4332		19.8572	33.2027	20.8517						19.1297	36.8736		39.8238	22.4919	32.8973	13.4235	33.4872	21.2715		39.4332
				32.8917	28.3137				17.142			32.1378	14.4068						15.7612	37.5772				32.8917	28.3137				17.142		26.6156	32.1378	14.4068						15.7612	37.5772		22.4316	16.9143	32.8917	28.3137	32.4647	24.825		17.142
				30.51	14.0467				28.9685			20.1589	21.3364						39.2763	14.248				30.51	14.0467				28.9685		10.9458	20.1589	21.3364						39.2763	14.248		30.7501	39.3776	30.51	14.0467	13.9634	36.1429		28.9685
				10.253	11.457				18.1891			32.4542	38.6907						19.8258	28.7542				10.253	11.457				18.1891		13.5543	32.4542	38.6907						19.8258	28.7542		35.1436	36.0849	10.253	11.457	10.5074	21.3746		18.1891
				14.5843	11.7086				26.6734			13.7848	39.6298						31.5235	29.2968				14.5843	11.7086				26.6734		29.1244	13.7848	39.6298						31.5235	29.2968		9.16139	25.7635	14.5843	11.7086	37.3353	35.6506		26.6734
				38.2704	37.8086				20.4971			13.0356	25.2763						15.6119	28.0873				38.2704	37.8086				20.4971		21.1353	13.0356	25.2763						15.6119	28.0873		36.0741	22.6011	38.2704	37.8086	23.3418	15.6441		20.4971
				22.3834	37.6292				12.573			27.8691	35.7369						15.4418	21.3117				22.3834	37.6292				12.573		11.8746	27.8691	35.7369						15.4418	21.3117		9.24752	19.7332	22.3834	37.6292	14.9209	15.3794		12.573
				28.8533	19.4221				10.2282			25.478	39.6715						11.654	23.3132				28.8533	19.4221				10.2282		19.8581	25.478	39.6715						11.654	23.3132		18.3102	13.7033	28.8533	19.4221	12.5569	24.4619		10.2282
				24.2746	36.705				13.1669				11.7463						8.02202	18.9612				24.2746	36.705				13.1669		7.46095	9.23837	11.7463						8.02202	18.9612		29.2501	31.6255	24.2746	36.705	9.61074	28.1727		13.1669
				7.11983	16.2701				36.0872				9.514						39.5253	15.2021				7.11983	16.2701				36.0872		18.4154	29.1367	9.514						39.5253	15.2021		16.037	19.8994	7.11983	16.2701	9.80537	31.4486		36.0872
				25.1194	39.8877				12.6401				22.1284						24.0532	20.2233				25.1194	39.8877				12.6401		14.1586	39.1122	22.1284						24.0532	20.2233		16.3446	21.6996	25.1194	39.8877	12.8226	33.4761		12.6401
				17.8175	30.0758				21.9684				18.7541						36.3644	37.2903				17.8175	30.0758				21.9684		39.3899	25.5741	18.7541						36.3644	37.2903		35.452		17.8175	30.0758	13.3142	9.27389		21.9684
				13.5395	16.9214				29.8608				38.7521						20.8457	14.4841				13.5395	16.9214				29.8608		35.2597	19.7189	38.7521						20.8457	14.4841		24.9729		13.5395	16.9214	35.0184	8.91532		29.8608
				28.9835	25.4061				15.9127				33.4177						27.4083	27.6227				28.9835	25.4061				15.9127		20.0604	38.2572	33.4177						27.4083	27.6227		25.9773		28.9835	25.4061	36.2152	19.9335		15.9127
				29.5182	37.8675				14.886				32.4729						13.7227	36.7921				29.5182	37.8675				14.886		20.7327	13.4196	32.4729						13.7227	36.7921		13.5967		29.5182	37.8675	15.8005	39.467		14.886
				17.4422	14.317				39.4047				19.0981						12.1181	33.1192				17.4422	14.317				39.4047		39.9427	11.3819	19.0981						12.1181	33.1192		20.6817		17.4422	14.317	26.929	20.4671		39.4047
				22.6899	12.9988				33.1473				19.2951						23.0007	29.1172				22.6899	12.9988				33.1473		10.2828	10.5452	19.2951						23.0007	29.1172				22.6899	12.9988	26.371	15.738		33.1473
				37.5519	33.6741				11.6801				18.5301						29.3868	28.9948				37.5519	33.6741				11.6801		30.5478		18.5301						29.3868	28.9948				37.5519	33.6741	18.6192	21.2162		11.6801
				10.5595	36.5059				31.5744				13.5747						38.0943	11.1999				10.5595	36.5059				31.5744		36.2054		13.5747						38.0943	11.1999				10.5595	36.5059	34.0247	22.7479		31.5744
				28.7016	24.5391				33.5744				7.00607						32.3705	39.9226				28.7016	24.5391				33.5744		20.8364		7.00607						32.3705	39.9226				28.7016	24.5391	16.5819	33.5888		33.5744
				15.3558	14.918				30.8696				18.0581						34.4371	31.8595				15.3558	14.918				30.8696		14.9442		18.0581						34.4371	31.8595				15.3558	14.918	18.713	12.7075		30.8696
				17.8722	9.86984				9.43457				29.9703						8.50022	22.3603				17.8722	9.86984				9.43457		25.9829		29.9703						8.50022	22.3603				17.8722	9.86984	32.2771	30.6696		9.43457
				31.9495	15.8793				22.8218				17.9247						7.21706	33.4708				31.9495	15.8793				22.8218		9.34241		17.9247						7.21706	33.4708				31.9495	15.8793	29.0724	15.5688		22.8218
				7.04536	9.57416				16.9741				27.9062						8.19409	34.7739				7.04536	9.57416				16.9741		30.1941		27.9062						8.19409	34.7739				7.04536	9.57416	36.6339	8.6604		16.9741
				30.9243	37.0375				22.5212				8.92699						16.3436	14.6162				30.9243	37.0375				22.5212		18.3349		8.92699						16.3436	14.6162				30.9243	37.0375	36.0633	37.1062		22.5212
				17.3466	10.1561				20.6757				15.1459						18.5403	24.0117				17.3466	10.1561				20.6757		12.8922		15.1459						18.5403	24.0117				17.3466	10.1561	10.9507	30.4746		20.6757
				11.0394	33.3812				20.4314				38.6337						7.21689	39.1585				11.0394	33.3812				20.4314		23.2348		38.6337						7.21689	39.1585				11.0394	33.3812	15.2583	33.9998		20.4314
				14.2168	24.5581				15.7362				33.2074						26.8725	35.7871				14.2168	24.5581				15.7362		38.0929		33.2074						26.8725	35.7871				14.2168	24.5581	7.34831	8.56962		15.7362
				26.1394	11.317				27.9135				38.375						11.1945	16.9607				26.1394	11.317				27.9135		17.1906		38.375						11.1945	16.9607				26.1394	11.317	37.5791	11.7321		27.9135
				26.512	14.3181				9.15866				33.9477						15.1539	33.8873				26.512	14.3181				9.15866		32.7931		33.9477						15.1539	33.8873				26.512	14.3181	25.0955	19.0909		9.15866
				39.9469	21.4838				30.2708				18.1729						7.07103	20.7211				39.9469	21.4838				30.2708		24.7827		18.1729						7.07103	20.7211				39.9469	21.4838	36.375	14.0973		30.2708
				20.005	13.1789				14.4029				25.7744						23.4081	18.8746				20.005	13.1789				14.4029		10.9689		25.7744						23.4081	18.8746				20.005	13.1789	29.3223	37.8773		14.4029
				7.41273	16.8921				36.5894				33.9018						34.7298	9.16824				7.41273	16.8921				36.5894		24.6693		33.9018						34.7298	9.16824				7.41273	16.8921	37.1505	27.4924		36.5894
				35.939	29.7774				31.5515				10.698						36.7493	7.18094				35.939	29.7774				31.5515		33.1513		10.698						36.7493	7.18094				35.939	29.7774	12.2589	30.7888		31.5515
				23.257	15.5892				29.4012				8.74922						23.554	22.8036				23.257	15.5892				29.4012		33.5973		8.74922						23.554	22.8036				23.257	15.5892	11.9572	30.3647		29.4012
				7.67077	16.7309								24.8719						35.9146	7.14698				7.67077	16.7309				38.6243		17.4492		24.8719						35.9146	7.14698				7.67077	16.7309	15.3012	16.1899		38.6243
				25.7638	36.0852								36.2975						20.2176	38.787				25.7638	36.0852				20.2051		25.1415		36.2975						20.2176	38.787				25.7638	36.0852	24.1236	26.3721		20.2051
				36.7071	10.84								30.7082						24.6968	9.29513				36.7071	10.84				7.99074		16.9253		30.7082						24.6968	9.29513				36.7071	10.84	27.2938	36.5568		7.99074
				9.3197	17.6468								13.9427						26.2584	37.7776				9.3197	17.6468				32.6942		13.108		13.9427						26.2584	37.7776				9.3197	17.6468	22.8144	32.3363		32.6942
				22.739	37.4611								28.9543						36.8118	20.511				22.739	37.4611				38.322		39.0002		28.9543						36.8118	20.511				22.739	37.4611	38.0781	17.8768		38.322
				38.1961	20.5385								21.0928						9.24854	15.7906				38.1961	20.5385				25.618		27.0758		21.0928						9.24854	15.7906				38.1961	20.5385	15.7042	38.8674		25.618
				37.9356	39.3621								27.6851						7.06902	13.482				37.9356	39.3621				32.832		7.47005		27.6851						7.06902	13.482				37.9356	39.3621	16.7757	18.8279		32.832
				39.9978	18.3917								26.5526						11.0901	22.7416				39.9978	18.3917				16.5777		15.9802		26.5526						11.0901	22.7416				39.9978	18.3917	25.7399	17.9569		16.5777
				34.7754	9.61178								20.1287						13.8721	21.3069				34.7754	9.61178				19.0651		14.701		20.1287						13.8721	21.3069				34.7754	9.61178	11.9804	9.4683		19.0651
				30.8716	33.9651								16.0198						25.2698	21.3591				30.8716	33.9651				31.6071		9.6348		16.0198						25.2698	21.3591				30.8716	33.9651	15.1995			31.6071
				26.3131	9.92633								30.7334						15.4324	29.2865				26.3131	9.92633				16.4732		30.2286		30.7334						15.4324	29.2865				26.3131	9.92633	10.3579			16.4732
				32.9105	32.1561								30.8175						17.7259	33.8999				32.9105	32.1561				25.2758		10.7421		30.8175						17.7259	33.8999				32.9105	32.1561	20.849			25.2758
				17.7765	16.0563								23.8318						22.0771	13.5619				17.7765	16.0563				21.3805		33.9615		23.8318						22.0771	13.5619				17.7765	16.0563	24.3739			21.3805
				20.8392	8.81392								15.3259						15.9736	28.6262				20.8392	8.81392				17.3875		9.71684		15.3259						15.9736	28.6262				20.8392	8.81392	32.606			17.3875
				38.8619	23.6909								26.3611						19.2632	31.3016				38.8619	23.6909				8.00327		32.8294		26.3611						19.2632	31.3016				38.8619	23.6909	31.1131			8.00327
				35.1541	7.44188								11.0915						28.2895					35.1541	7.44188				35.1509		34.4358		11.0915						28.2895	33.8249				35.1541	7.44188	22.4733			35.1509
				20.3031	23.6995								34.9729						30.119					20.3031	23.6995				29.6991		35.0561		34.9729						30.119	33.5307				20.3031	23.6995	37.2474			29.6991
				22.7121	11.7259								21.9187						33.871					22.7121	11.7259				25.266		15.3084		21.9187						33.871	16.5321				22.7121	11.7259	22.4202			25.266
				8.24831	24.6494								15.279						13.1709					8.24831	24.6494						37.2685		15.279						13.1709	25.4083				8.24831	24.6494	7.34982			36.5871
				16.3757	10.3677								11.342						13.6664					16.3757	10.3677						14.2788		11.342						13.6664	37.3452				16.3757	10.3677	37.7449			32.7209
				33.3407	14.5782								10.0894						13.5831					33.3407	14.5782						17.7016		10.0894						13.5831	37.8755				33.3407	14.5782	28.0303			24.6748
				23.1619	31.1494								34.3655						8.95586					23.1619	31.1494						30.9162		34.3655						8.95586	16.6797				23.1619	31.1494	36.5707			39.2251
				25.8238	34.3372								8.49945						12.3482					25.8238	34.3372						20.3224		8.49945						12.3482	20.3128				25.8238	34.3372	15.4653			36.2489
				17.7137	36.581								19.9784						23.0676					17.7137	36.581						15.3957		19.9784						23.0676	14.3577				17.7137	36.581	28.5087			28.8152
				26.2372	16.3372								17.1817						32.1635					26.2372	16.3372						29.2207		17.1817						32.1635	21.3893				26.2372	16.3372	39.1701			35.7174
				29.8832	33.4155								10.2515						14.6963					29.8832	33.4155						7.59671		10.2515						14.6963	33.8505				29.8832	33.4155	38.046			38.3377
				16.5011	26.122								13.1065						8.51286					16.5011	26.122						37.9492		13.1065						8.51286	39.4307				16.5011	26.122	11.5489			11.7957
				17.1218	35.5122								19.2801						7.32246					17.1218	35.5122						37.6129		19.2801						7.32246	25.1853				17.1218	35.5122	16.926			30.15
				28.112	16.212								14.8816						23.015					28.112	16.212						33.0954		14.8816						23.015	24.01				28.112	16.212	31.6011			38.2547
				28.838	30.7405								38.7591						29.8338					28.838	30.7405						14.9787		38.7591						29.8338	14.1277				28.838	30.7405	22.4911			17.1459
				18.8861	21.6374								14.4657						9.50733					18.8861	21.6374						27.0242		14.4657						9.50733	36.4149				18.8861	21.6374	37.7948			27.354
				19.4516	16.5614								39.6124						19.853					19.4516	16.5614						11.2264		39.6124						19.853	17.3475				19.4516	16.5614	35.6325			35.0675
				29.3098	28.463								21.1057						12.5576					29.3098	28.463						23.1559		21.1057						12.5576	25.5936				29.3098	28.463	14.2833			26.9326
				39.4071	39.2582								11.7296						17.2602					39.4071	39.2582						17.2879		11.7296						17.2602	34.8099				39.4071	39.2582	9.4774			12.0154
				35.6214	22.5848								16.0207						28.3306					35.6214	22.5848						13.6286		16.0207						28.3306	39.7677				35.6214	22.5848	36.8102			13.3718
				30.1874	27.7551								16.8961						23.6773					30.1874	27.7551						33.0903		16.8961						23.6773	29.8357				30.1874	27.7551	16.2111			8.96066
				34.973	26.0842								20.4827						12.0335					34.973	26.0842						14.5949		20.4827						12.0335	20.4303				34.973	26.0842	31.8987			23.432
				33.9324	22.8735								31.1339						14.0319					33.9324	22.8735						14.8543		31.1339						14.0319	35.8159				33.9324	22.8735	12.9567			30.9536
				24.8587	33.3675								10.4358						38.4972					24.8587	33.3675						22.3085		10.4358						38.4972	22.5246				24.8587	33.3675	26.0902			15.3847
				20.0611	30.0628								21.327						31.4525					20.0611	30.0628						31.755		21.327						31.4525	14.8946				20.0611	30.0628	14.9266			18.5756
				28.5114	9.22743								22.4815						15.3582					28.5114	9.22743						15.2015		22.4815						15.3582	23.0249				28.5114	9.22743	21.8872			21.8908
				9.72943	35.3649								26.9777						22.6184					9.72943	35.3649						32.9887		26.9777						22.6184	7.38504				9.72943	35.3649	14.1124			32.418
				37.3198	12.993								9.59833						17.8254					37.3198	12.993						24.7375		9.59833						17.8254	12.8429				37.3198	12.993	22.8581			29.8809
				35.2572	16.7954								24.5933						37.7357					35.2572	16.7954						23.3696		24.5933						37.7357	37.3473				35.2572	16.7954	35.6717			34.1631
				22.1945	30.4322								12.3748						39.9207					22.1945	30.4322								12.3748						39.9207	8.39327				22.1945	30.4322				38.5504
				35.3908	14.1016								22.7407						26.2188					35.3908	14.1016								22.7407						26.2188	37.7238				35.3908	14.1016				31.2771
				17.3353	14.1084								29.6535						34.6403					17.3353	14.1084								29.6535						34.6403	39.3166				17.3353	14.1084				7.96855
				19.0901	25.485								22.5333						11.8377					19.0901	25.485								22.5333						11.8377	32.3105				19.0901	25.485				7.14182
				22.482	34.3159								28.9002						29.0587					22.482	34.3159								28.9002						29.0587	13.2418				22.482	34.3159				36.2152
				24.1435	20.2226								13.5958						17.3002					24.1435	20.2226								13.5958						17.3002	16.2488				24.1435	20.2226				35.3166
				18.9766	14.3629								14.7952						36.7499					18.9766	14.3629								14.7952						36.7499	22.0685				18.9766	14.3629				30.6628
				37.8293	30.9548								36.5355						18.2234					37.8293	30.9548								36.5355						18.2234	19.7446				37.8293	30.9548				30.9651
				17.4909	39.0941								26.7649						28.4515					17.4909	39.0941								26.7649						28.4515	25.9009				17.4909	39.0941				25.017
				26.865	27.695								16.5316						32.8576					26.865	27.695								16.5316						32.8576	19.8158				26.865	27.695				28.3836
				33.4276	36.1891								32.7689						39.3813					33.4276	36.1891								32.7689						39.3813	34.8767				33.4276	36.1891				15.0692
				26.2123	32.9725								34.393						8.96167					26.2123	32.9725								34.393						8.96167	9.82307				26.2123	32.9725				10.4983
					32.8707								21.4493						16.2723					27.4392	32.8707								21.4493						16.2723	35.6061				27.4392	32.8707				15.4684
					18.6302								10.3103						14.8431					37.5605	18.6302								10.3103						14.8431	21.3379				37.5605	18.6302				19.8342
					29.0732								27.0347						34.6801					28.5117	29.0732								27.0347						34.6801	35.5743				28.5117	29.0732				22.2115
					27.8741								24.3263						12.0785					31.5914	27.8741								24.3263						12.0785	11.0578				31.5914	27.8741				21.9937
					14.3572								18.3469						33.8759					13.5115	14.3572								18.3469						33.8759	38.6156				13.5115	14.3572				24.0994
					32.0433								18.1167						16.2871					11.1941	32.0433								18.1167						16.2871	23.1805				11.1941	32.0433				30.9797
					18.2815								37.8682						28.696					22.3715	18.2815								37.8682						28.696	32.9982				22.3715	18.2815				37.3643
					28.61								17.7161						37.0346					27.3227	28.61								17.7161						37.0346	26.9801				27.3227	28.61				10.8912
					30.0306								28.904						9.54107					36.3088	30.0306								28.904						9.54107	18.6564				36.3088	30.0306				22.8485
					12.1357								33.6757						36.7498					36.7747	12.1357								33.6757						36.7498	36.7802				36.7747	12.1357				7.08033
					23.9419								34.8117						21.7298					7.86344	23.9419								34.8117						21.7298	25.5658				7.86344	23.9419				7.66037
					37.1124								12.0844						39.0748					23.8053	37.1124								12.0844						39.0748	11.1778				23.8053	37.1124				36.0306
					38.1386								21.8805						27.0866					30.6428	38.1386								21.8805						27.0866	35.3167				30.6428	38.1386				9.43146
					39.2284								24.5156						10.269					20.3804	39.2284								24.5156						10.269	10.5901				20.3804	39.2284				7.71602
					8.77658								37.3031						24.5845					26.3913	8.77658								37.3031						24.5845	17.8552				26.3913	8.77658				30.8193
					23.7486								20.6852						19.6174					30.2098	23.7486								20.6852						19.6174	21.4321				30.2098	23.7486				28.0726
					8.16622								33.7251						29.4287					27.7535	8.16622								33.7251						29.4287	23.3866				27.7535	8.16622				7.98071
					38.1086								39.2983						29.3856					38.9569	38.1086								39.2983						29.3856	21.5625				38.9569	38.1086				35.0706
					23.2066								38.7218						28.1378					26.0603	23.2066								38.7218						28.1378	31.2609				26.0603	23.2066				28.4072
					25.595								31.162						19.1418					18.4794	25.595								31.162						19.1418	10.9598				18.4794	25.595				22.24
					16.3828								13.4072						31.4806					30.756	16.3828								13.4072						31.4806	25.8596				30.756	16.3828				23.9696
					37.8686								25.3229						13.8068					37.0171	37.8686								25.3229						13.8068	24.7954				37.0171	37.8686				24.4724
					37.1511								19.3446						24.6702					19.2339	37.1511								19.3446						24.6702	21.0089				19.2339	37.1511				30.5985
					17.631								34.8965						25.8437					37.624	17.631								34.8965						25.8437	23.9031				37.624	17.631				29.915
					16.5717								9.56814						35.7027					25.6632	16.5717								9.56814						35.7027	20.764				25.6632	16.5717				13.8712
					23.4408								27.2743						21.2722					27.156	23.4408								27.2743						21.2722	9.76852				27.156	23.4408				27.0993
					15.7255								16.4353						27.6628					39.5436	15.7255								16.4353						27.6628	34.8773				39.5436	15.7255				37.7751
					29.9387								18.6619						16.9664					25.2617	29.9387								18.6619						16.9664	7.72501				25.2617	29.9387				26.0681
					10.6348								31.2777						27.2867					13.8094	10.6348								31.2777						27.2867	27.3862				13.8094	10.6348				10.5541
					26.072								34.8178						16.0199					24.1423	26.072								34.8178						16.0199	33.2				24.1423	26.072				30.1956
					17.2486								22.9842						37.0039					24.3452	17.2486								22.9842						37.0039	12.2843				24.3452	17.2486				23.1156
					20.6484								15.005						14.5023					38.1055	20.6484								15.005						14.5023	23.7317				38.1055	20.6484				28.5251
					36.4699								27.6948						30.7452					25.9666	36.4699								27.6948						30.7452	38.112				25.9666	36.4699				20.7328
					17.2444								21.78						13.848					11.6717	17.2444								21.78						13.848	27.8849				11.6717	17.2444				33.8269
					25.412								29.7476						38.3327					24.9213	25.412								29.7476						38.3327	28.7301				24.9213	25.412				34.5532
					30.9226								11.3674						30.5763					15.6809	30.9226								11.3674						30.5763	24.9374				15.6809	30.9226				12.2889
					17.9634								20.0487						17.2045					39.3003	17.9634								20.0487						17.2045	38.1425				39.3003	17.9634				33.0652
					7.10619								15.3609						29.0965					20.8536	7.10619								15.3609						29.0965	34.8723				20.8536	7.10619				36.5491
					10.7682								19.9544						33.0737					7.80299	10.7682								19.9544						33.0737	32.5702				7.80299	10.7682				36.3299
					26.8162								35.5308						37.4606					9.66847	26.8162								35.5308						37.4606	36.3184				9.66847	26.8162				34.354
					20.319								8.30849						18.335					37.0683	20.319								8.30849						18.335	35.4099				37.0683	20.319				16.538
					7.6336								24.7141						34.3171					32.3689	7.6336								24.7141						34.3171	10.7488				32.3689	7.6336				33.2909
					15.9765								36.4058						17.3763					32.4096	15.9765								36.4058						17.3763	26.811				32.4096	15.9765				9.45114
					18.0398								16.519						28.6626					29.2261	18.0398								16.519						28.6626	20.3223				29.2261	18.0398				31.4876
					34.5892								15.3018						24.6361					12.8098	34.5892								15.3018						24.6361	28.1167				12.8098	34.5892				20.9182
					13.0127								28.216						18.9174					18.4986	13.0127								28.216						18.9174	22.1374				18.4986	13.0127				23.5694
													18.0997						39.1551					8.53262	34.7179								18.0997						39.1551	13.1875				8.53262	34.7179				35.4639
													8.27296						7.05872					38.1991	24.5671								8.27296						7.05872	21.358				38.1991	24.5671				23.7008
													32.8355						38.3733					29.9677	7.55333								32.8355						38.3733	29.1568				29.9677	7.55333				16.7133
													30.0515						23.3141					25.4906	20.4454								30.0515						23.3141	24.1389				25.4906	20.4454				36.4064
													9.56587						9.21209						20.6244								9.56587						9.21209	28.6766				10.9764	20.6244				10.7476
													9.79817						7.15542						27.2578								9.79817						7.15542	31.8964				25.2567	27.2578				39.4234
													31.7236						15.6593						35.7528								31.7236						15.6593	24.9976				26.7906	35.7528				32.9542
													28.9312						20.0425						21.9993								28.9312						20.0425	14.5404				33.644	21.9993				7.61774
													7.8097						16.3864						20.5763								7.8097						16.3864	10.2953				23.5795	20.5763				34.4758
													22.256						35.4813						18.433								22.256						35.4813	37.2309				24.634	18.433				13.2623
													24.4917						36.1424						35.9788								24.4917						36.1424	14.947				35.2614	35.9788				18.5669
													31.2962						14.4547						27.5667								31.2962						14.4547	7.26472				20.172	27.5667				19.5476
													33.9173						20.5926						33.879								33.9173						20.5926	31.4419				20.8103	33.879				11.9298
													19.0793						8.56833						19.8953								19.0793						8.56833	36.633					19.8953				24.6402
													12.5375						26.5741						14.5723								12.5375						26.5741	7.58917					14.5723				26.3743
													12.1838						20.5851						14.9743								12.1838						20.5851	33.1787					14.9743				10.1492
													26.449						38.22						19.9566								26.449						38.22	7.4853					19.9566				25.2999
													10.2207						32.2848						16.5956								10.2207						32.2848						16.5956				18.3419
													34.8918						24.1097						20.8639								34.8918						24.1097						20.8639				18.7135
													38.512						13.0383						31.025								38.512						13.0383						31.025				29.0574
													20.0167						12.8753						32.7238								20.0167						12.8753						32.7238				11.2013
													32.0465						39.8406						31.8219								32.0465						39.8406						31.8219				21.237
													25.8405						30.1974						8.55453								25.8405						30.1974						8.55453				31.057
													21.097						39.4891						7.76694								21.097						39.4891						7.76694				15.0705
													29.8779						27.7296						37.2402								29.8779						27.7296						37.2402				32.4115
													27.3699						36.5567						31.8284								27.3699						36.5567						31.8284				33.6713
													30.292						13.5773						12.2868								30.292						13.5773						12.2868				26.2222
													13.4703						7.84777						9.40369								13.4703						7.84777						9.40369				32.0272
													8.06154						31.2371						12.901								8.06154						31.2371						12.901				19.1696
													22.4855						7.07398						32.227								22.4855						7.07398						32.227				31.0485
													11.3229						10.5423						19.4796								11.3229						10.5423						19.4796				36.5552
													22.4684						21.3292						17.8559								22.4684						21.3292						17.8559
													38.1497						12.3738						12.9261								38.1497						12.3738						12.9261
													32.6756						36.9691						30.2198								32.6756						36.9691						30.2198
													10.854						34.8726						17.3916								10.854						34.8726						17.3916
													20.3584						35.8415						16.1896								20.3584						35.8415						16.1896
													27.9591						31.8536						21.2383								27.9591						31.8536						21.2383
													26.971						29.5974						9.18686								26.971						29.5974						9.18686
													35.0064						38.0455						10.8618								35.0064						38.0455						10.8618
													10.5261						25.0707						15.7381								10.5261						25.0707						15.7381
													16.809						22.0888						38.9363								16.809						22.0888						38.9363
													23.8138						11.4455						9.83309								23.8138						11.4455						9.83309
													35.4407						22.0059						28.8298								35.4407						22.0059						28.8298
													37.2965						16.09						20.49								37.2965						16.09						20.49
													22.9982						27.0798						25.8567								22.9982						27.0798						25.8567
													12.8253						19.6306						37.6786								12.8253						19.6306						37.6786
													20.1804						27.7316						7.20217								20.1804						27.7316						7.20217
													13.5596						25.482						9.8874								13.5596						25.482						9.8874
													23.1868						16.6738						31.4893								23.1868						16.6738						31.4893
													25.9517						39.271						33.8858								25.9517						39.271						33.8858
													20.6482						19.8069						7.08284								20.6482						19.8069						7.08284
													38.7856						32.5006						30.7618								38.7856						32.5006						30.7618
													16.217						13.1837						24.0976								16.217						13.1837						24.0976
													24.5487						39.7078						32.8928								24.5487						39.7078						32.8928
													21.7069						14.3242						9.61222								21.7069						14.3242						9.61222
													35.8839						23.6669						20.607								35.8839						23.6669						20.607
													28.2292						24.9955						7.36078								28.2292						24.9955						7.36078
													26.6362						17.7653						7.10967								26.6362						17.7653						7.10967
													20.2273						34.2904						38.4758								20.2273						34.2904						38.4758
													7.47307						9.35067						11.9322								7.47307						9.35067						11.9322
													24.4831						17.5078						37.9636								24.4831						17.5078						37.9636
													27.5867						15.8392						17.2678								27.5867						15.8392						17.2678
													10.9062						9.13393						31.3877								10.9062						9.13393						31.3877
													24.8926						27.6017						38.2862								24.8926						27.6017						38.2862
													24.9448						30.5022						19.2331								24.9448						30.5022						19.2331
													32.3202						36.532						29.3277								32.3202						36.532						29.3277
													13.6725						36.4235						32.9414								13.6725						36.4235						32.9414
													12.9403						12.4686						23.134								12.9403						12.4686						23.134
													31.6299						22.6098														31.6299						22.6098						25.5571
													33.7582						30.2469														33.7582						30.2469						38.4246
													13.4042						38.8235														13.4042						38.8235						20.2718
													16.2915						9.27736														16.2915						9.27736						13.6599
													12.3073						22.4273														12.3073						22.4273						31.1902
													9.4683						24.2969														9.4683						24.2969						36.9335
													28.2556						19.8845														28.2556						19.8845						22.4112
													22.2139						13.9701														22.2139						13.9701						9.08446
													24.9187						30.4901														24.9187						30.4901						8.12869
													22.1927						27.7449														22.1927						27.7449						11.1084
													18.4216						10.9913														18.4216						10.9913						21.0678
													22.3494						12.1837														22.3494						12.1837						7.82096
													29.7325						32.873														29.7325						32.873						15.3438
													11.8263						38.6989														11.8263						38.6989						8.04997
													23.4759						13.1622														23.4759						13.1622						21.9528
													38.3201						34.0953														38.3201						34.0953						12.8423
													19.8743						35.2299														19.8743						35.2299						28.8695
													31.2015						14.1211														31.2015						14.1211						39.3874
													19.5984						29.648														19.5984						29.648						12.5755
													27.2312						16.3978														27.2312						16.3978						18.1507
													38.2737						27.5538														38.2737						27.5538						22.5825
													11.5762						27.7263														11.5762						27.7263						13.3444
													11.0809						7.73653														11.0809						7.73653						25.1273
													25.7856						14.2501														25.7856						14.2501						26.9012
													32.1113						14.297														32.1113						14.297						13.9474
													21.6001						25.4064														21.6001						25.4064						15.6448
													30.7021						16.793														30.7021						16.793						30.0623
													37.9944						38.1025														37.9944						38.1025						28.8849
													16.8996						15.8397														16.8996						15.8397						16.2619
													15.9162						33.4564														15.9162						33.4564						19.1868
													9.15876						39.8159														9.15876						39.8159						25.9261
													19.0262						34.4056														19.0262						34.4056						18.0589
													21.7169						22.1295														21.7169						22.1295						7.11297
													26.357						33.6314														26.357						33.6314						20.5082
													36.5618						35.3661														36.5618						35.3661						17.9042
													27.8243						32.1118														27.8243						32.1118						33.2598
													16.3113						16.92														16.3113						16.92						36.1164
													10.6627						22.8575														10.6627						22.8575
													8.9677						20.2679														8.9677						20.2679
													15.3947						33.8747														15.3947						33.8747
													33.6201						16.5304														33.6201						16.5304
													20.7548						9.63475														20.7548						9.63475
													34.6759						23.0843														34.6759						23.0843
													24.6089						9.24551														24.6089						9.24551
													35.6442						25.2416														35.6442						25.2416
													7.44915						23.951														7.44915						23.951
													12.1169						31.1183														12.1169						31.1183
													39.1728						29.9961														39.1728						29.9961
													15.2877						32.9891														15.2877						32.9891
													35.6448						34.4616														35.6448						34.4616
													31.1798						7.9244														31.1798						7.9244
																			12.973														27.1683						12.973
																			31.5057																				31.5057
																			15.1899																				15.1899
																			18.2928																				18.2928
																			16.8163																				16.8163
																			10.3123																				10.3123
																			13.5687																				13.5687
																			13.4713																				13.4713
																			32.7629																				32.7629
																			26.0618																				26.0618
																			16.4876																				16.4876
																			22.2928																				22.2928
																			18.7753																				18.7753
																			21.816																				21.816
																			19.6539																				19.6539
																			36.8865																				36.8865
																			19.8215																				19.8215
																			20.5718																				20.5718
																			9.62089																				9.62089
																			13.5421																				13.5421
																			36.7403																				36.7403
																			17.3371																				17.3371
																			39.5803																				39.5803
																			25.7782																				25.7782
																			11.0397																				11.0397
																			33.0565																				33.0565
																			16.1089																				16.1089
																			15.6823																				15.6823
																			16.8229																				16.8229
																			32.3733																				32.3733
																			25.5895																				25.5895
																			8.24499																				8.24499
																			8.23178																				8.23178
																			17.9486																				17.9486
																			11.5046																				11.5046
																			11.1618																				11.1618
																			31.8002																				31.8002
																			19.714																				19.714
																			15.0936																				15.0936
																			14.7229																				14.7229
																			32.82																				32.82
																			31.887																				31.887
																			15.478																				15.478
																			27.5802																				27.5802
																			39.3353																				39.3353
																			11.2728																				11.2728
																			16.3764																				16.3764
																			31.3358																				31.3358
																			33.4318																				33.4318
																			38.3725																				38.3725
																			29.4424																				29.4424
																			14.8593																				14.8593
																			33.3312																				33.3312
																			24.6165																				24.6165
																			33.4089																				33.4089
																			11.6911																				11.6911
																			21.9454																				21.9454
																			30.1326																				30.1326
																			23.4262																				23.4262
																			33.7614																				33.7614
																			26.8525																				26.8525
																			18.8607																				18.8607
																			25.2102																				25.2102
																			11.0511																				11.0511
																			39.3787																				39.3787
																			20.2019																				20.2019
																			10.1167																				10.1167
																			38.8404																				38.8404
																			8.69244																				8.69244
																			31.8132																				31.8132
																			19.2741																				19.2741
																			16.5673																				16.5673
																			33.4773																				33.4773
																			27.3667																				27.3667
																			9.96456																				9.96456
																			8.12604																				8.12604
																			33.7984																				33.7984
																			37.5042																				37.5042
																			7.80632																				7.80632
																			14.8157																				14.8157
																			35.2886																				35.2886
																			36.0644																				36.0644
																			20.7987																				20.7987
																			13.2106																				13.2106
																			15.2844																				15.2844
																			13.2604																				13.2604
																			26.7817																				26.7817
																			15.4633																				15.4633
																			9.72926																				9.72926
																			35.6586																				35.6586
																			28.3903																				28.3903
																			33.248																				33.248
																			34.1942																				34.1942
																			16.9588																				16.9588
																			30.0005																				30.0005
																			26.6351																				26.6351
																			9.13812																				9.13812
																			7.25942																				7.25942
																			7.92888																				7.92888
																			9.80981																				9.80981
																			33.8274																				33.8274
																			17.7467																				17.7467
																			34.0106																				34.0106
																			9.82464																				9.82464
																			19.9046																				19.9046
																			18.5123																				18.5123
																			23.4381																				23.4381
																			30.1709																				30.1709
																			19.4938																				19.4938
																			13.5884																				13.5884
																			10.6504																				10.6504
																			9.7156																				9.7156
																			36.0975																				36.0975
																			8.22851																				8.22851
																			23.5998																				23.5998
																			38.8952																				38.8952
																			16.6664																				16.6664
																			26.4313																				26.4313
																			26.0253																				26.0253
																			29.5776																				29.5776
																			8.28798																				8.28798
																			10.2212																				10.2212
																			12.1298																				12.1298
																			29.0509																				29.0509
																			27.7221																				27.7221
																			33.3864																				33.3864
																			26.9816																				26.9816
																			9.78311																				9.78311
																			33.5168																				33.5168
																			10.6871																				10.6871
																			10.3469																				10.3469
																			9.03876																				9.03876
																			14.084																				14.084
																			29.7777																				29.7777
																			35.4469																				35.4469
																			8.81182																				8.81182
																			39.3717																				39.3717
																			23.6234																				23.6234
																			13.1354																				13.1354
																			10.931																				10.931
																			38.9944																				38.9944
																			17.1557																				17.1557
																			39.0997																				39.0997
																			15.874																				15.874
																			18.3857																				18.3857
																			11.6521																				11.6521
																			29.4647																				29.4647
																			27.7739																				27.7739
																			31.4224																				31.4224
																			26.3447																				26.3447
																			19.0544																				19.0544
																			33.4329																				33.4329
																			36.6078																				36.6078
																			7.53735																				7.53735
																			14.1184																				14.1184
																			7.69402																				7.69402
																			37.3889																				37.3889
																			17.7262																				17.7262
																			24.4109																				24.4109
																			36.4314																				36.4314
																			25.9074																				25.9074
																			39.4671																				39.4671
																			24.2789																				24.2789
																			35.9811																				35.9811
																			15.4595																				15.4595
																			15.8105																				15.8105
																			11.3505																				11.3505
																			9.09091																				9.09091
																			13.375																				13.375
																			25.2281																				25.2281
																			29.8054																				29.8054
																			13.5751																				13.5751
																			22.7344																				22.7344
																			16.8205																				16.8205
																			22.3896																				22.3896
																			15.2364																				15.2364
																			31.8865																				31.8865
																			30.0491																				30.0491
																			8.37024																				8.37024
																			13.4931																				13.4931
																			9.58976																				9.58976
																			22.8745																				22.8745
																			16.9074																				16.9074
																			31.9512																				31.9512
																			7.89114																				7.89114
																			20.4772																				20.4772
																			7.40233																				7.40233
																			29.6067																				29.6067
																			23.2016																				23.2016
																			15.2982																				15.2982
																			17.3287																				17.3287
																			35.6149																				35.6149
																			10.5254																				10.5254
																			12.2592																				12.2592
																			23.2605																				23.2605
																			30.7729																				30.7729
																			24.8546																				24.8546
																			26.0431																				26.0431
																			32.6729																				32.6729
																			17.0516																				17.0516
																			17.0894																				17.0894
																			27.3842																				27.3842
																			14.5796																				14.5796
																			33.1318																				33.1318
																			35.6209																				35.6209
																			15.3596																				15.3596
																			14.6838																				14.6838
																			15.4939																				15.4939
																			29.3914																				29.3914
																			21.8237																				21.8237
																			27.7938																				27.7938
																			10.1072																				10.1072
																			34.9966																				34.9966
																			10.8383																				10.8383
																			26.7306																				26.7306
																			26.1148																				26.1148
																			21.4162																				21.4162
																			28.1735																				28.1735
																			26.2739																				26.2739
																			34.1878																				34.1878
																			30.4916																				30.4916
																			22.9216																				22.9216
																			14.0628																				14.0628
																			10.6678																				10.6678
																			28.1284																				28.1284
																			22.8709																				22.8709
																			9.47593																				9.47593
																			15.1288																				15.1288
																			37.9401																				37.9401
																			31.1383																				31.1383
																			27.8045																				27.8045
																			37.2766																				37.2766
																			20.471																				20.471
																			12.038																				12.038
																			38.0992																				38.0992
																			29.6909																				29.6909
																			9.28174																				9.28174
																			34.5844																				34.5844
																			37.453																				37.453
																			8.67072																				8.67072
																			22.1605																				22.1605
																			26.245																				26.245
																			7.18168																				7.18168
																			22.8681																				22.8681
																			9.68439																				9.68439
																			24.1719																				24.1719
																			9.78214																				9.78214
																			25.6714																				25.6714
																			9.16172																				9.16172
																			10.9369																				10.9369
																																							18.4785
																																							12.9409
																																							13.5981
																																							37.1502
																																							32.8793
																																							15.4268
																																							28.1699
																																							32.8416
																																							16.0308
																																							8.10592
																																							36.2527
																																							12.0814
																																							29.9269
																																							10.8166
																																							19.211
																																							10.4016
																																							34.2312
																																							21.6024
																																							16.6965
																																							31.3913
																																							12.6886
																																							26.335
																																							19.4587
																																							14.5184
																																							21.3267
																																							17.4818
																																							34.3483
																																							24.6534
																																							23.5894
																																							34.2979
[truncated: 50 more columns]
